# Supplementary material
Source: publisher figshare collection journal article supplement (https://frontiersin.figshare.com/ndownloader/files/26899577)
Supplement: Supplementary file 1 [file 26899577]

Name	Simbad	GDR2_ID	BIN	SpT	Teff	M_star	RA	DEC	Plx	pmRA	pmDEC	Gmag	BPmag	RPmag	Other_names
					K	Msun	deg	deg	mas	mas/yr	mas/yr	mag	mag	mag
11 Com	11 Com	3946945413106333696	1	G8III	4755.00	2.70	185.1787792782	17.7932516383	10.7104	-109.241	88.170	4.3724	4.9789	3.7934
11 UMi	11 UMi	1696798367260229376	0	K4III	4248.70	1.80	229.2745954107	71.8239428401	7.9539	3.430	10.113	4.4999	5.2938	3.7875
14 And	14 And	1920113512486282240	0	G8III	4740.00	2.20	352.8241500269	39.2358367441	13.2289	287.292	-83.758	4.8718	5.4736	4.3018
14 Her	14 Her	1385293808145621504	0	K0V	5282.00	1.00	242.6021014218	43.8163620983	55.7363	132.019	-296.464	6.3793	6.8301	5.8252
16 Cygni B	16 Cygni B	2135550755683407232	1	G3V	5777.25	1.07	295.4656422032	50.5168243042	47.2754	-134.791	-162.493	6.0568	6.4178	5.5859	16 Cyg B
18 Del	18 Del	1756741374681702784	1	G6III	5083.75	2.30	314.6078375275	10.8391377871	13.0922	-50.034	-34.198	5.2438	5.7520	4.6679
1RXS J160929.1-210524	1RXS J160929.1-210524	6243841249531772800	0	M0.0e	4076.58	0.85	242.3762343365	-21.0831402633	7.1595	-10.274	-23.204	12.0572	12.9499	11.1311	1RXS J160929.1-210524, 1RXS 1609
1RXS J235133.3+312720	1RXS J235133.3+312720	2868476822978587904	1	M2.0V	4038.23	0.45	357.8908462358	31.4560168203	23.2183	106.584	-87.761	12.5145	13.8205	11.3891	1RXS J235133.3+312720
1SWASP J1407	ASAS J140748-3945.7	6117085769513415168	0	K5IVe	4373.23	0.90	211.9495779479	-39.7619703600	7.1835	-22.985	-21.094	11.9458	12.6476	11.1479
24 Boo	24 Boo	1603662211901473408	0	G3V	5025.75	0.99	217.1555242396	49.8446487532	10.3900	-304.064	-46.816	5.3053	5.8157	4.7404
24 Sex	24 Sex	3830897080395058048	0	K0IV	5020.00	1.54	155.8684866408	-0.9023998277	13.8488	65.220	-36.272	6.1984	6.6952	5.5992
2MASS J01225093-2439	2MASS J01225093-2439505	5040416186560252416	0	M3.5V	3976.25	0.40	20.7128012126	-24.6646127743	29.5326	120.455	-123.398	12.9025	14.4402	11.7008	2MASS J01225093-2439505
2MASS J1155-7919	2MASS J11550485-7919108	5199985216726016896	0	M3	4109.83	0.59	178.7691633580	-79.3197557552	9.8862	-41.179	-4.336	14.8180	16.8257	13.4678
2MASS J22362452+4751	2MASS J22362452+4751425	1986772848034988544	0	K7	4085.00	0.60	339.1025931290	47.8616829870	14.3444	62.891	-30.484	11.9484	12.7860	11.0686	2MASS J22362452+4751425, 2M 2236+4751
2MASS J2250+2325	2MASS J22501512+2325342	2837047214379099904	0	M3	3861.44	0.43	342.5634097134	23.4259057815	17.4443	70.229	-64.237	13.5759	15.0420	12.3887
30 Ari B	30 Ari B	102082477749475200	1	F6V	6211.27	1.16	39.2412735926	24.6480103203	22.3641	141.411	-10.677	6.9609	7.2458	6.5700
38 Vir	38 Vir	3679242575447826432	0	F6V	6382.33	1.18	193.2953521316	-3.5531132984	30.0702	-262.638	-3.853	5.9867	6.2494	5.6226	HD 111998
4 UMa	4 UMa	1092230803510960640	0	K1III	4430.00	1.23	130.0528099142	64.3280504494	13.5901	-61.223	26.362	4.1604	4.8533	3.5130	4 Uma
42 Dra	42 Dra	2256800156348230400	1	K1.5III	4480.00	0.98	276.4975053131	65.5633652385	11.0061	105.248	-25.104	4.3638	5.0905	3.7289
47 UMa	47 UMa	777254360337133312	0	G1V	5947.00	1.06	164.8647610876	40.4304930986	72.4528	-317.642	55.014	4.8306	5.2027	4.4260	47 Uma
51 Eri	51 Eri	3205095125321700480	1	F0IV	7190.10	1.75	69.4007424385	-2.4738245104	33.5770	44.352	-63.833	5.1224	5.2993	4.9108
51 Peg	51 Peg	2835207319109249920	0	G2IV	5830.00	1.04	344.3675399325	20.7690957522	64.6488	207.363	62.094	5.2560	5.6354	4.8183
55 Cancri	55 Cancri	704967037090946688	1	K0IV-V	5306.00	0.90	133.1468372549	28.3298153847	79.4274	-485.872	-233.651	5.7144	6.1714	5.1579	55 Cnc
6 Lyn	6 Lyn	1004358968092652544	0	K0.5III	5000.00	1.82	97.6960310917	58.1611753421	18.2668	-30.421	-338.678	5.5878	6.0926	4.9941
61 Vir	61 Vir	3507879565090229888	0	G6.5V	5915.33	0.95	199.5964549770	-18.3157744892	117.5731	-1070.808	-1063.001	4.4772	4.9251	4.0542
7 CMa	7 CMa	2939555954747554176	0	K1.5III	4735.00	1.34	99.1712760011	-19.2561807858	50.4571	61.992	-72.806	3.5776	4.2735	3.0295
70 Vir	70 Vir	3740176925743650688	3	G4Va	6245.00	1.09	202.1064898406	13.7763084923	55.8347	-235.562	-576.283	4.7087	5.1606	4.2652
75 Cet	75 Cet	2500064286492779264	1	K1III	4846.25	2.49	38.0391598330	-1.0350269400	12.0264	-23.619	-30.485	5.0551	5.6171	4.4640
8 Ursae Minoris	8 Ursae Minoris	1700658653802527104	0	K0	4921.22	1.80	224.2016849662	74.9009379437	6.1230	12.795	3.571	6.5590	7.0905	5.9311	8 UMi, 8 Umi
81 Cet	81 Cet	2495420602212048640	0	K0III	4829.75	2.40	39.4243554917	-3.3963606528	9.8489	42.066	-43.331	5.3488	5.9017	4.7292
83 Leonis B	83 Leonis B	3812355294261019904	1	K3	4800.50	0.85	171.6896869996	3.0071331183	54.9057	-728.277	188.526	7.2600	7.8057	6.6220
91 Aquarii A	91 Aqr	2630155547353593216	1	K1-III	4700.00	1.40	348.9745030999	-9.0878075892	22.6884	368.372	-17.167	3.8633	4.5251	3.2730	91 Aqr
AB Pic	AB Pic	5495052596695570816	0	K1V(e)	5068.50	0.83	94.8039207790	-58.0541184091	19.9521	14.339	45.072	8.8378	9.3252	8.2307
alf Ari	* alf Ari		0	K2III		1.50	31.7933570833	23.4624175556	49.5600	188.550	-148.080				alpha Ari
alf Tau	* alf Tau		1	K5+III		1.13	68.9801640000	16.5093020000	48.9400	63.450	-188.940
AS 205A	AS 205A	6245891976154382720	1	K0e	5143.45	0.90	242.8806369754	-18.6406090787	7.8170	-7.450	-26.891	12.3696	12.5675	10.5601
AU Mic	AU Mic	6794047652729201024	0	M1Ve	3992.36	0.50	311.2911368831	-31.3424500164	102.8295	281.424	-359.895	7.8404	8.9360	6.8120
Barnard's star	Barnard's star	4472832130942575872	0	M4V	3699.35	0.16	269.4486143580	4.7379807656	547.4506	-802.803	10362.542	8.1951	9.8104	6.9699
BD-06 1339	BD-06 1339	3022099969137163904	0	K7V	4081.58	0.64	88.2511811374	-5.9963378392	49.3062	-1.045	-346.721	9.1068	9.9492	8.2415	BD -06 1339, Gliese 221
BD-08 2823	BD-08 2823	3770419611540574080	0	K4V	4757.23	0.74	150.1971963899	-9.5165689443	24.1641	-375.517	25.460	9.5033	10.0921	8.8135	BD -08 2823
BD-10 3166	BD-10 3166	3758629479636689536	0	K3.0V	5335.50	0.85	164.6191243243	-10.7704226556	11.8187	-184.836	-8.374	9.8398	10.2761	9.2825	BD -10 3166
BD-11 4672	BD-11 4672	4154598526336121600	0	K7V	4191.60	0.57	278.3688659077	-11.6370480559	36.7812	-288.590	-235.560	9.4851	10.2488	8.6754	BD -11 4672
BD-17 63	BD-17 63	2367734656180397952	0	K4V	4669.69	0.74	7.1413494381	-16.2273253675	28.9903	-355.181	-227.737	9.2011	9.8358	8.4792	HIP 2247
BD+14 4559	BD+14 4559	1759623813132980864	0	K5	4869.17	0.86	318.4010001591	14.6893834154	20.2337	233.993	-0.275	9.3511	9.8851	8.7038	BD +14 4559
BD+20 1790	BD+20 1790	3363049071685181056	0	K5e	4306.00	0.63	110.9313206873	20.4152985659	35.9766	-65.576	-230.952	9.5074	10.2281	8.6983
BD+20 594	BD+20 594	58200934326315136	0	K0	5456.77	0.96	53.6511231377	20.5990204500	5.5437	36.571	-51.365	10.8644	11.2365	10.3531	BD +20 594
BD+24 4697	BD+24 4697	2843794470563210496	0	K2	4977.00	0.75	345.4148859447	25.7871810874	22.3253	218.280	-173.463	9.4837	9.9986	8.8486
BD+26 1888	BD+26 1888	691524682806651776	0	K7	4754.60	0.76	135.6270772161	25.8886035638	27.6829	-118.934	-190.783	9.4747	10.0549	8.7874
beta Cancri	beta Cancri	3098404220677760512	1	K4III	4239.00	1.70	124.1286379097	9.1853305517	11.0443	-48.986	-50.839	2.9266	3.9675	2.3519	bet Cnc, beta Cnc
beta Cir	beta Cir	5877059048305044480	0	A3Va	8213.50	1.96	229.3777324754	-58.8017930033	35.1736	-96.742	-136.541	3.9732	4.1030	3.9733
beta Pic	beta Pic	4792774797545105664	0	A6V	7099.50	1.60	86.8212336609	-51.0661480316	50.6231	2.493	82.577	3.7248	3.9522	3.6777	bet Pic
beta Ursae Minoris	* bet UMi		0	K4III		1.40	222.6763575000	74.1555039444	24.9100	-32.610	11.420				bet UMi, beta Umi
CD Cet	CD Cet	3179036008830848	0	M4.5Ve	3670.15	0.16	48.3530154703	4.7751881088	116.1536	1741.859	86.017	12.1232	14.1528	10.7954
CD-35 2722	CD-35 2722	2885863400349980288	0	M1Ve	3831.83	0.40	92.3300146641	-35.8255375321	44.6346	-3.723	-56.273	10.2176	11.2781	9.2286
CHXR 73	CHXR 73	5201175987817179136	0	M3e		0.35	166.6193984608	-77.6258725218	5.2343	-22.193	0.215	17.2934	19.8218	15.7633
CI Tau	CI Tau	145203159127518336	0	K4IVe	3635.00	0.80	68.4667684561	22.8416192219	6.3008	8.904	-17.067	12.1454	13.1602	11.0514
CoRoT-7	CoRoT-7	3107267177757848576	1	K0V	5101.20	0.93	100.9561682031	-1.0630076290	6.2250	10.960	-0.108	11.5239	11.9646	10.9517
CT Cha	CT Cha	5201360671411974912	0	K7Ve	4200.20	0.82	166.0375038223	-76.4553693411	5.2144	-22.209	-0.175	11.7733	12.5443	10.8615
DH Tau	DH Tau	151374202498079872	1	M1Ve	3751.50	0.40	67.4231673614	26.5493897018	7.3880	7.065	-20.699	12.4961	13.5451	11.4457
DMPP-1	HD 38677	3011005587574818432	0	F8V	6088.00	1.21	86.7761233094	-10.6303216698	15.9613	2.727	-21.273	7.8503	8.1506	7.4376	HD 38677
DMPP-2	HD 11231	5017319806652067072	0	F5V	6293.13	1.44	27.4077310009	-34.4590985309	7.2208	-27.380	7.606	8.4582	8.7116	8.0916	HD 11231
DMPP-3 A	HD 42936	5266148569447305600	2	K0IV/V	5105.50	0.87	91.6243532066	-72.5143057188	21.2977	-1.412	-383.637	8.8543	9.3244	8.2694	HD 42936
DS Tuc A	DS Tuc	6387058411482257536	1	G6V	5597.50	1.01	354.9154672903	-69.1960429629	22.6663	79.464	-67.440	8.3193	8.7044	7.8137
EPIC 201128338	EPIC 201128338	3596508242468505216	0	M0.0V	4137.84	0.63	181.6324077738	-5.8274310704	9.1921	-92.854	-4.525	13.0383	13.9476	12.1076	K2-152
EPIC 201238110	EPIC 201238110	3600975145895223040	0	M	3588.00	0.41	179.7058531611	-3.3894613340	6.2509	-25.108	-12.442	15.2612	16.4267	14.1858
EPIC 201598502	EPIC 201598502	3700937760929835648	0	M3.0V	4094.43	0.55	183.8088708717	2.0208764878	6.9584	-75.259	-16.098	14.2706	15.2592	13.2919	K2-153
EPIC 203771098	EPIC 203771098	6049750234317822208	0	G3V	5178.96	1.12	242.5734558598	-24.9906029200	5.8346	-59.919	-58.811	10.9072	11.3567	10.3212	K2-24
EPIC 203826436	EPIC 203826436	6049595065740634624	0	G3V	4953.00	0.90	243.4509661899	-24.7870526895	5.5291	-11.074	2.464	12.2573	12.7944	11.5781	K2-37
EPIC 204129699	EPIC 204129699	6050191241556876672	1	G7V	5267.47	0.91	245.4405530650	-23.5482730354	9.0193	-40.230	-96.332	10.5371	10.9668	9.9739
EPIC 204221263	EPIC 204221263	6237129658760381056	3	G2V	5182.70	1.07	240.0333094501	-23.1894195669	5.1625	-56.969	-37.626	11.1840	11.6301	10.6144	K2-38
EPIC 206011691	EPIC 206011691	2596888100773300224	0	M0V	4213.49	0.68	340.3037846052	-14.4893255910	11.9265	20.736	-78.905	12.2785	13.1027	11.4005	K2-21
EPIC 206032309	EPIC 206032309	2597400855444243840	0	M3	3550.12	0.22	341.2404562918	-13.9011222567	6.1694	-66.103	-49.607	16.0689	17.3405	14.9424
EPIC 206215704	EPIC 206215704	2615281560211505408	0	M	3637.57	0.41	335.0949721153	-9.5097112342	9.0727	16.114	-43.033	16.1722	17.4759	15.0381
EPIC 211331236	EPIC 211331236	597829077890316928	0	M1.0V	3844.26	0.54	133.8557342403	10.4692176415	9.8107	11.549	18.058	13.8012	14.8740	12.7741	K2-117
EPIC 211945201	EPIC 211945201	636363799347569408	0	G0	6027.47	1.17	136.5741931190	19.4020565166	5.4753	45.491	-41.790	10.0512	10.3523	9.6272
EPIC 212006344	EPIC 212006344	663843343706623232	1	M0V	4068.96	0.62	126.4762178739	20.3593383804	13.8516	-21.933	-53.569	12.3708	13.3593	11.3997	K2-122
EPIC 212069861	EPIC 212069861	685065155072248192	0	M0V	3872.37	0.62	134.4441403709	21.4532748319	6.1610	-11.480	-58.869	14.0916	15.0391	13.1321	K2-123
EPIC 213715787	EPIC 213715787	6764974194470777600	0	M2	4126.86	0.58	293.8330329026	-28.4984750122	11.0149	-31.426	-147.533	13.1913	14.2633	12.1686	K2-147
EPIC 220194974	EPIC 220194974	2536443724641751808	1	K7	4312.91	0.65	14.5176494204	-0.1932580249	8.0061	-38.699	-23.591	13.0599	13.8757	12.1863	K2-148
EPIC 220522664	EPIC 220522664	2557342829345854208	0	M1.0V	3836.66	0.59	9.8217519402	7.2769938562	8.0569	-31.024	-23.108	13.7795	14.8301	12.7654	K2-149
EPIC 220598331	EPIC 220598331	2579495171146737280	0	M2.5V	3565.67	0.46	18.3443908037	8.9874328286	9.7297	46.690	-25.634	14.8150	16.1566	13.6712	K2-150
EPIC 220621087	EPIC 220621087	2579620343673729408	1	M1.5V	3624.00	0.47	19.3047733135	9.5012663046	14.3638	55.385	-29.011	13.3119	14.4134	12.2741	K2-151
EPIC 228813918	EPIC 228813918	3583729340372873344	0	M3V	3359.00	0.46	186.8704259823	-6.1952168440	10.0853	-79.533	3.155	14.4345	15.7614	13.2939	K2-137
EPIC 228934525	EPIC 228934525	3683121446312149504	0	M0.0V	4125.30	0.65	189.0015172828	-2.6696216777	7.7018	0.750	-34.568	13.3173	14.2216	12.3868	K2-154
EPIC 247267267	EPIC 247267267	3413793491812093824	0	K6	4089.55	0.63	79.1407971409	20.2549034414	9.2935	25.000	-45.938	12.8598	13.6945	11.9859	K2-284
EPIC 248435473	EPIC 248435473	3855246074629979264	1	K	4424.00	0.69	157.9356855475	0.9372781871	12.8650	56.871	-68.828	11.3527	12.0511	10.5752	K2-266
EPIC 248545986	EPIC 248545986	3857872051994269824	0	M5	3720.77	0.40	160.5941265431	4.4413750884	32.1414	-42.265	3.976	13.4367	14.7874	12.2923	K2-239
EPIC 249801827	EPIC 249801827	6257625719430982016	0	M0	4010.31	0.58	227.8493709870	-17.8754464230	13.6878	-53.748	-52.323	12.6212	13.5955	11.6535	K2-240
EPIC 249889081	EPIC 249889081	6264513270727342080	0	K7	4035.96	0.64	233.3698192307	-16.7737112823	13.1035	57.807	-105.645	12.1652	13.0049	11.2806	K2-286
eps Coronae Borealis	eps Coronae Borealis	1220404653534258816	1	K2III	4347.50	1.70	239.3965057195	26.8776170710	14.2898	-76.981	-59.474	3.6599	4.4312	3.0306	eps CrB, epsilon CrB
eps Eri	eps Eri	5164707970261630080	0	K2V	4975.00	0.83	53.2284306011	-9.4581715152	312.2191	-975.376	20.266	3.3691	4.0026	2.8830	epsilon Eri, eps Eridani
eps Tau	eps Tau	48026706557926528	0	K0III	4670.75	2.70	67.1546572910	19.1802781776	20.3130	107.503	-38.066	3.1587	3.9236	2.6921	epsilon Tau
Epsilon Indi A	eps Ind	6412595290592307840	1	K5V	4585.00	0.76	330.8714021017	-56.7969023118	274.8048	3967.039	-2535.758	4.2733	4.9221	3.6386	eps Ind A
eta Cet	eta Cet	2470140321628277504	0	K1III	4637.00	1.70	17.1484079847	-10.1828630675	28.2634	217.524	-140.138	3.0391	3.8708	2.5367
Fomalhaut	* alf PsA		0	A4V		1.92	344.4117750009	-29.6218361113	129.8100	328.950	-164.670
TOI-732	TOI 732	3767281845873242112	1	M4.0	3857.61	0.40	154.6449033230	-11.7178009951	45.4644	-341.409	-247.870	11.8465	13.3521	10.6583	LTT 3780, G 162-44
G 196-3	G 196-3	824017070904063104	0	M3.0V	3653.73	0.40	151.0884753977	50.3861805905	45.8611	-141.177	-202.394	10.6123	11.8795	9.5274
G 9-40	G 9-40	684992690384102528	0	M2.5	3708.00	0.29	134.7188514191	21.0747960506	35.7781	175.512	-318.469	12.7331	14.1182	11.5825
G204-39	G204-39	1350714133093019904	0	M2.5V	3856.82	0.36	269.4622641477	46.5911358387	71.4754	-15.183	578.300	10.5633	11.9711	9.4254
gam Lib	gam Lib	6265374394490149248	0	G8.5III	4711.00	1.47	233.8818636217	-14.7895019854	21.0823	63.824	9.885	3.5474	4.2134	2.9931	gamma Lib
Gamma Cephei	Gamma Cephei	2281778105591104768	1	K1III	4707.25	1.18	354.8358233479	77.6331008549	73.8307	-62.997	171.457	2.8044	3.8725	2.4506	gam Cep, gamma Cep, gamma Cephei
Gamma Leonis	* gam Leo		1	K1III		1.23	154.9934458333	19.8412583333	25.0700	304.300	-154.280				gam 1 Leo, gamma Leo A, gamma 1 Leo
GJ 1061	GJ 1061	4848140361962951552	0	M5.5V	3319.50	0.12	54.0032485633	-44.5143104220	272.2446	745.286	-373.673	10.9889	13.3035	9.6219
GJ 1132	GJ 1132	5413438219396893568	0	M4	3631.11	0.18	153.7090695896	-47.1549357711	79.2543	-1053.979	414.300	12.1380	13.7582	10.9217
GJ 1214	GJ 1214	4393265392167891712	0	M4.5V	3438.05	0.18	258.8313990847	4.9606794730	68.2653	580.447	-749.588	13.0089	14.9324	11.6962	Gliese 1214
GJ 1252	GJ 1252	6468968316900356736	0	M2.5V	3772.00	0.38	306.9286461875	-56.4622865172	49.0558	424.414	-1230.623	11.2364	12.4812	10.1611
GJ 1265	GJ 1265	6825822095663585536	0	M5	3443.36	0.18	333.4324674854	-17.6870623212	97.5087	856.890	-306.305	12.0807	13.9141	10.8067
GJ 143	GJ 143	4673947174316727040	0	K4.5V	4628.47	0.73	51.7501882168	-63.5001660000	61.2455	355.084	-247.460	7.6791	8.3286	6.9502
GJ 15 A	GJ 15 A	385334230892516480	1	M2V	3988.00	0.38	4.6126677370	44.0247295779	280.6902	2891.525	411.903	7.2162	8.3553	6.1822	Gliese 15 A, GJ 15A
GJ 160.2	GJ 160.2	5091077112523802112	0	K7V	4370.75	0.69	61.6454172935	-20.8564724041	38.6473	53.094	-779.016	9.2015	9.9161	8.4173
GJ 163	GJ 163	4780294722094459904	0	M3.5	3723.77	0.40	62.3228352662	-53.3711768147	66.0714	1046.141	584.130	10.6771	12.0974	9.5346	Gliese 163
GJ 176	GJ 176	3409711211681795584	0	M2.5V	3897.93	0.49	70.7353853292	18.9533579604	105.5627	656.378	-1116.502	8.9996	10.2328	7.9233	HD 285968, Gliese 176
GJ 179	GJ 179	3288082758293022848	0	M2V	3539.00	0.36	73.0245494533	6.4752346831	80.9036	153.425	-306.106	10.7055	12.2501	9.5232	Gliese 179
GJ 180	GJ 180	2979590513145784192	0	M3V	3811.50	0.43	73.4600969790	-17.7761940193	83.7182	408.571	-644.464	9.9339	11.1572	8.8679
GJ 229	GJ 229	2940856402123426176	0	M1V	3912.54	0.58	92.6435993409	-21.8677233014	173.6955	-135.985	-719.088	7.3072	8.3862	6.3041
GJ 27.1	GJ 27.1	4980466929964496128	0	M0V	3945.54	0.53	9.9980015540	-44.2541678647	42.3328	482.467	-220.759	10.5790	11.6716	9.5702
GJ 273	GJ 273	3139847906304421632	0	M3.5V	3970.53	0.29	111.8545563403	5.2098984630	262.9800	572.510	-3693.510	8.5945	10.1076	7.3568
GJ 3021 A	GJ 3021 A	4634528720388462592	1	G8V	5520.00	0.90	4.0634322704	-79.8514217607	56.9319	433.908	-56.322	6.3937	6.8107	5.8787	Gliese 3021 A, HD 1237
GJ 3082	GJ 3082	4915139584039259392	0	M3V	3910.00	0.47	18.6432425085	-53.9407750829	60.1445	103.371	310.988	10.2011	11.3353	9.1794
GJ 3138	GJ 3138	5144740907820131840	0	K9V	4056.83	0.68	32.2977385361	-16.3392494547	35.0943	516.324	79.403	10.1924	11.1343	9.2658
GJ 317	GJ 317	5701750711020088192	0	M3.5V	3589.79	0.42	130.2445254257	-23.4528089880	65.7744	-461.162	805.571	10.7539	12.2457	9.5831	Gliese 317
GJ 328	GJ 328	577602496345490176	0	M0V	3989.91	0.69	133.7819507489	1.5420010922	48.6883	44.745	-1045.971	9.2861	10.2077	8.3667	Gliese 328
GJ 3293	GJ 3293	4893118771316702720	0	M2.5	3545.00	0.42	67.1484425174	-25.1713396074	49.4999	-81.426	-485.473	10.9788	12.3085	9.8744	Gliese 3293
GJ 3323	GJ 3323	3187115498866675456	0	M4.0Ve	3303.00	0.16	75.4868824025	-6.9485133071	186.0231	-551.722	-533.936	10.6467	12.4393	9.3969
GJ 3341	GJ 3341	4827532078086044416	0	M2	3758.00	0.47	78.9471415488	-31.2948458245	42.3099	494.228	249.754	11.1029	12.3472	10.0377	Gliese 3341
GJ 3470	GJ 3470	654687847820642560	0	M2.0Ve	3775.50	0.51	119.7735020720	15.3912090143	33.9601	-185.734	-57.263	11.3537	12.5863	10.2906	Gliese 3470
GJ 3512	GJ 3512	1040827088726734976	0	M5.70	3384.00	0.12	130.3316615821	59.4918363670	105.3856	-260.421	-1279.613	13.1117	15.4166	11.7267
GJ 357	GJ 357	5664814198431308288	0	M2.5V	3805.50	0.34	144.0074644102	-21.6650633621	105.8830	138.694	-990.311	9.8804	11.1899	8.7925
GJ 3634	GJ 3634	5452743423618768000	0	M2	3685.02	0.45	164.6433493473	-31.1443382589	49.0440	-566.861	-91.371	10.9233	12.1927	9.8419	Gliese 3634
GJ 3779	GJ 3779	1446540213584440704	0	M4V	3834.64	0.27	200.7335357533	24.4639425344	72.7352	-615.951	-865.128	11.6266	13.2218	10.4202
GJ 3942	GJ 3942	1428030622526979968	0	M0.5Ve	3873.57	0.63	242.2645451847	52.9441442504	59.0421	203.934	61.990	9.4077	10.4160	8.4432
GJ 3998	GJ 3998	4540061704988054400	0	M1V	3889.00	0.50	259.0020506622	11.0561750848	55.0799	-137.311	-347.315	9.9834	11.0949	8.9671
GJ 422	GJ 422	5339892367683264384	0	M3.5	3816.00	0.35	168.9810458406	-57.5425628843	78.9410	-2468.481	1183.909	10.4771	11.8557	9.3483
GJ 4276	GJ 4276	2200501793758177152	0	M3.5Ve	3901.57	0.41	336.3221454411	59.4125029693	46.8398	122.369	-310.095	11.6605	13.2001	10.4625
GJ 433	GJ 433	3478160727866058368	0	M2V	3780.80	0.48	173.8619194401	-32.5436301520	110.2908	-70.768	-850.679	8.8914	10.0602	7.8453	Gliese 433
GJ 436	GJ 436	4017860992519744384	0	M3V	3660.42	0.44	175.5505363266	26.7030669015	102.5015	895.047	-814.030	9.5715	10.9173	8.4599	Gliese 436
GJ 504	GJ 504	3732539683617410816	0	G0V	6100.00	1.22	199.1923479707	9.4249781093	57.0186	-336.665	190.579	5.0010	5.3553	4.6224
GJ 536	GJ 536	3657653114880309248	0	M0V	3990.82	0.52	210.2597263891	-2.6522900561	96.0398	-825.424	598.112	8.8588	9.9612	7.8420
GJ 581	GJ 581	6322070093095493504	0	M3V	3660.26	0.31	229.8564725001	-7.7226934955	158.7492	-1221.467	-97.129	9.4110	10.8360	8.2676	Gliese 581
GJ 625	GJ 625	1428427236986209024	0	M1.5V	3763.10	0.30	246.3557854144	54.3033625136	154.4710	432.073	-171.668	9.1370	10.3693	8.0691
GJ 649	GJ 649	4572835535272064768	0	M2V	3972.55	0.54	254.5363221482	25.7419719107	96.3141	-115.479	-507.887	8.8187	9.9193	7.8002	Gliese 649
GJ 667 C	GJ 667 C	5975663354131618304	1	M1.5V	3775.40	0.33	259.7510609178	-34.9977651101	138.0171	1131.612	-215.545	9.3803	10.6147	8.3113	Gliese 667 C
GJ 674	GJ 674	5951824121022278144	0	M3V	3700.00	0.35	262.1700475551	-46.8989825958	219.8012	572.582	-880.251	8.3306	9.6814	7.2156	Gliese 674
GJ 676 A	GJ 676 A	5925209583053212800	1	M0V	4006.03	0.71	262.5448902593	-51.6377776891	62.3650	-257.873	-184.509	8.8652	9.8338	7.9212	Gliese 676 A
GJ 682	GJ 682	5955305209191546112	1	M3.5	3729.00	0.27	264.2610245058	-44.3232519089	199.7031	-706.117	-937.912	9.5702	11.2234	8.3361
GJ 685	GJ 685	1439069444391326208	1	M1V	3870.07	0.55	263.8960378183	61.6793482197	69.8254	261.895	-514.400	9.1671	10.2091	8.1888
GJ 687	GJ 687	1637645127018395776	0	M3.0V	3825.53	0.41	264.1041731120	68.3336740567	219.7807	-320.636	-1269.528	8.0275	9.4119	6.8860	Gliese 687
GJ 758	GJ 758	2046207670631964928	0	K0V	5404.33	0.97	290.8921433644	33.2226558318	64.0623	81.803	160.392	6.1457	6.5723	5.6101
GJ 785	GJ 785	6847167606385195648	0	K2V	5090.51	0.80	303.8284711789	-27.0337556176	113.6481	1242.527	-181.044	5.4532	5.9544	4.8848	HD 192310, Gliese 785
GJ 832	GJ 832	6562924609150908416	0	M2/3V	3993.46	0.45	323.3912616174	-49.0125168982	201.4073	-45.834	-816.604	7.7376	8.9197	6.6760	Gliese 832
GJ 849	GJ 849	2627117287488522240	0	M3.5V	3856.53	0.49	332.4229937913	-4.6408317423	113.6000	1132.534	-22.125	9.2245	10.6321	8.0856	Gliese 849
GJ 86	GJ 86	4937000898855759104	1	K1.5V	5263.50	0.80	32.6224785087	-50.8209944544	92.7042	2124.853	638.092	5.8740	6.3371	5.3184	Gliese 86
GJ 876	GJ 876	2603090003484152064	0	M3.5V	3837.21	0.37	343.3239737122	-14.2665958156	213.8669	957.961	-673.638	8.8753	10.4773	7.6618	Gliese 876
GJ 96	GJ 96	354077348697687424	0	M0V	3845.50	0.60	35.5624031210	47.8802075303	83.7829	215.926	41.087	8.6319	9.6499	7.6623
GJ 9827	GJ 9827	2643842302456085888	0	K6V	4173.54	0.61	351.7717762576	-1.2853434765	33.6855	376.019	216.071	9.8377	10.6010	9.0157
GJ 378	GJ 378	823228721066990720	0	M1V	4063.29	0.56	150.5865513053	48.0824515339	66.8407	-633.076	-1474.978	9.2651	10.3053	8.2748	Gl 378
GJ 49	GJ 49	522863309964987520	1	M1.5V	3777.00	0.52	15.6687321227	62.3454386403	101.4650	731.135	90.690	8.6628	9.8124	7.6319	Gliese 49
GJ 686	GJ 686	4550763526539955712	0	M1.5Ve	3990.82	0.42	264.4764878395	18.5959509461	122.5609	926.741	984.697	8.7390	9.8398	7.7225	Gl 49
GP Com	GP Com	3938156295111047680	0	DBe	9307.00	0.33	196.4251090266	18.0178621729	13.7309	-344.791	34.743	15.9470	15.8863	15.9080	Gl 686
GQ Lup	GQ Lup	6011522757643074304	1	K7Ve	4092.57	0.70	237.3003642797	-35.6515054803	6.5868	-14.257	-23.596	11.2608	12.0334	10.2823
GSC 06214-00210	GSC 06214-00210	6244440552088537600	0	M1e	4513.73	0.90	245.4776920993	-20.7193397841	9.1880	-19.379	-31.248	11.8633	12.6229	11.0332	GSC 6214-210
GSC 08047-00232	GSC 08047-00232	4913138232356971136	0	K2V(e)	4890.61	0.80	28.0612929487	-52.3259297081	11.5878	49.940	-10.426	10.6100	11.1644	9.9379
GU Psc	GU Psc	2784120641627589760	0	M3	4031.81	0.32	18.1464850473	17.0650028647	21.0019	96.642	-100.704	12.9656	14.3418	11.8199
HAT-P-1	HAT-P-1	1928431764627661440	1	G0V	5718.00	1.13	344.4453631852	38.6749189579	6.2615	32.384	-41.751	10.1786	10.5101	9.7141
HAT-P-11	HAT-P-11	2086512227851023872	0	K4V	4757.27	0.81	297.7101763266	48.0818635249	26.4508	125.984	232.988	9.1510	9.7437	8.4651
HAT-P-12	HAT-P-12	1499514786891168640	0	K5	4869.27	0.73	209.3886452267	43.4933099859	6.9763	-134.791	-44.294	12.4197	13.0213	11.6979
HAT-P-15	HAT-P-15	179498266829041664	0	G5	4919.46	1.01	66.2481419745	39.4606019607	5.1664	14.403	-9.377	11.7232	12.2785	11.0366
HAT-P-17	HAT-P-17	1849786481031300608	0	G0	5135.67	0.86	324.5359780641	30.4881881960	10.7960	-80.395	-126.972	10.2743	10.7139	9.7048
HAT-P-18	HAT-P-18	1334573817793362560	0	K2V	4804.17	0.77	256.3463760126	33.0123251290	6.1669	-14.073	-36.689	12.3682	12.9392	11.6810
HAT-P-2	HAT-P-2	1380825667768742144	0	F8V	6338.35	1.36	245.1514324384	41.0479601338	7.7975	-10.312	-29.198	8.5984	8.8510	8.2376
HAT-P-20	HAT-P-20	869913435026514688	1	K3V	4500.50	0.76	111.9164295334	24.3361185113	14.0483	-4.985	-96.235	10.9903	11.6647	10.2347
HAT-P-22	HAT-P-22	846946629987527168	1	G5	5275.70	0.92	155.6814593170	50.1287114533	12.2014	-26.182	83.727	9.5194	9.9494	8.9605
HAT-P-26	HAT-P-26	3668036348641580288	0	K1	5046.65	0.82	213.1565508228	4.0594174625	7.0221	37.839	-142.891	11.4641	11.9484	10.8532
HAT-P-3	HAT-P-3	1510191594552968832	1	K	5093.67	0.92	206.0940141860	48.0285650375	7.4031	-19.746	-24.008	11.2795	11.7686	10.6721
HAT-P-54	HAT-P-54	3383298227579280640	0	K	4236.69	0.64	99.8979923553	25.4824005326	6.9325	-0.073	-33.237	13.0172	13.7969	12.1815
HATS-6	HATS-6	2966680597368750720	0	M1V	3699.00	0.57	88.1468078577	-19.0316268359	5.8774	-2.533	7.349	14.3601	15.3839	13.3581
HATS-71	HATS-71	4710594412266148352	0	M3	3316.00	0.57	15.5518892788	-61.7561332924	7.1029	78.858	-27.095	15.3512	16.7435	14.1873	HATS-71A
HATS-72	HATS-72	2594869603582993792	0	K	4628.78	0.73	339.0258400794	-17.0003046166	7.8090	-108.621	-84.412	12.0725	12.7084	11.3341
HD 100655	HD 100655	3979226627820659072	1	G9III	4891.00	2.40	173.7653631324	20.4415409554	7.2613	-59.695	-1.047	6.1732	6.7006	5.5518
HD 100777	HD 100777	3786035184916139136	0	G8V	5532.45	1.00	173.9646302518	-4.7555425496	20.1596	-11.353	35.358	8.2387	8.6340	7.7248
HD 10180	HD 10180	4716158250340258944	0	G1V	5891.00	1.06	24.4731132937	-60.5114881074	25.6379	-14.377	8.274	7.1726	7.5112	6.7202
HD 101930	HD 101930	5341787994441794176	1	K2V	5083.00	0.74	175.8756079957	-58.0053798323	33.2740	16.689	348.997	7.9666	8.4449	7.3751
HD 102117	HD 102117	5341673851394297600	0	G6V	5630.00	1.03	176.2097267450	-58.7040133988	25.2369	-63.555	-70.439	7.2819	7.6676	6.7875
HD 102195	HD 102195	3799626935341796096	0	K0V	5300.00	0.93	176.4254063202	2.8209912250	34.0560	-188.735	-113.403	7.8466	8.2900	7.2959
HD 102365	HD 102365	5381537023379295232	1	G2V	5878.33	0.85	176.6208002911	-40.4986211223	107.6210	-1530.558	402.910	4.6557	5.0699	4.2286	HD 102365 A
HD 102843	HD 102843	3794501355731126016	0	K0V	5436.50	0.95	177.5854673144	-1.2522989288	15.9056	-404.672	36.572	9.0488	9.4563	8.5154
HD 102956	HD 102956	845335158256083584	1	K0III	4981.50	1.68	177.8436988001	57.6406583995	8.1753	-12.107	-17.578	7.6084	8.1079	6.9976
HD 103197	HD 103197	5370827127297364480	0	K1V(p)	5135.67	0.90	178.2201971094	-50.2927910632	17.4700	-80.938	7.188	9.1642	9.6221	8.5854
HD 103720	HD 103720	3601912720075891968	0	K1IV/V	5017.00	0.79	179.1713307632	-2.7791392921	21.9322	-63.978	-42.996	9.2238	9.7228	8.6032
HD 103774	HD 103774	3574907305749250432	1	F6V	6350.37	1.34	179.2310729496	-12.1079951291	17.6990	-124.888	-20.159	7.0094	7.2707	6.6460	HD 103774 A
HD 103949	HD 103949	3492633633781166336	0	K3V	4792.16	0.77	179.5479558018	-23.9241220696	37.7076	-172.809	-54.465	8.3848	8.9419	7.7239
HD 104067	HD 104067	3494677900774838144	0	K2V	4974.38	0.79	179.7923542827	-20.3556057604	49.0793	141.869	-423.911	7.6203	8.1467	6.9831
HD 10442	HD 10442	2560311854337920000	0	K0IV	5034.00	1.56	25.4715239599	2.7044193193	7.3591	22.153	8.909	7.5774	8.0861	6.9615
HD 104985	HD 104985	1693159194226600192	0	G8.5IIIb	4758.00	2.30	181.3157854487	76.9053359352	9.9146	147.071	-92.204	5.4743	6.0448	4.8434
HD 106252	HD 106252	3905603054348141440	0	G0	5888.25	0.96	183.3730583451	10.0404301866	26.1595	22.863	-280.009	7.2628	7.5948	6.8103
HD 106270	HD 106270	3581292685166588672	0	G5IV	5562.00	1.33	183.4049257787	-9.5135645465	10.6318	-99.035	-42.431	7.3953	7.7931	6.8856
HD 106315	HD 106315	3698307419878650240	0	F5V	6439.50	1.07	183.4724742014	-0.3934357161	9.1163	-2.662	11.988	8.8884	9.1390	8.5233
HD 10647	HD 10647	4912580642524184960	0	F9V	6143.00	1.11	25.6233525669	-53.7412851865	57.6556	165.832	-105.515	5.3549	5.6770	4.9660
HD 106515 A	HD 106515 A	3584074376569429248	1	G5V	5380.00	0.97	183.7762698827	-7.2575413347	29.3041	-251.577	-51.389	7.7777	8.1936	7.2398
HD 106574	HD 106574	1683875089840663168	0	K2III	4489.75	1.20	183.7850740797	70.1998885634	6.7471	-24.506	-27.777	5.3301	5.9924	4.6493
HD 10697	HD 10697	95652018353917056	0	G3Va	5654.00	1.15	26.2324075629	20.0826973556	30.1639	-42.979	-104.889	6.0961	6.4815	5.6114
HD 107148	HD 107148	3693358861640279296	1	G5V	5761.33	1.12	184.8059772647	-3.3199927293	20.2077	-54.787	-47.395	7.8511	8.2106	7.3773
HD 108147	HD 108147	6053512007260865280	0	F8/G0V	6202.75	1.19	186.4409852380	-64.0223491982	25.6648	-182.519	-60.777	6.8534	7.1529	6.4510
HD 108341	HD 108341	5842782219960409728	1	K2V	5086.00	0.84	186.8791724205	-71.4224895675	20.4167	-120.764	114.186	9.1434	9.6160	8.5546	HD 108341 A
HD 108863	HD 108863	3952692457305436800	1	K0III-IV	4961.67	1.85	187.5826081310	21.9480993181	6.0417	-75.501	-33.669	7.4542	7.9809	6.8187
HD 108874	HD 108874	3958951942642583936	0	G9V	5556.00	1.00	187.6126029194	22.8794399323	16.7730	127.453	-90.120	8.5750	8.9629	8.0642
HD 109246	HD 109246	1692267077979468544	0	G0V	5827.00	1.01	188.0271840354	74.4893379152	14.7128	-171.944	-48.645	8.5873	8.9333	8.1248
HD 109271	HD 109271	3578137838413202688	1	G3/5V	5748.40	1.05	188.3973969786	-11.6215204104	17.8697	-169.693	80.882	7.8782	8.2301	7.4037
HD 109749 A	HD 109749 A	6147000074988843264	1	G3V	5805.48	1.20	189.3173489377	-40.8121457884	15.8240	-157.374	-6.481	8.0246	8.3689	7.5591	HD 109749
HD 110014	HD 110014	3676091134604409728	0	K2III	4445.00	2.09	189.8111935035	-7.9956701551	9.9026	-77.129	-23.967	4.2365	4.9281	3.5976
HD 111232	HD 111232	5855730584310531200	3	G8V	5605.00	0.78	192.2159552734	-68.4246679372	34.5049	27.287	112.419	7.4053	7.7879	6.9012
HD 111591	HD 111591	3955257343054729984	0	K0III	4930.23	1.94	192.5725483433	22.8631285186	8.7307	103.616	-65.546	6.1461	6.6841	5.5088
HD 113337	HD 113337	1676282377934772608	1	F6V	6667.33	1.40	195.4438495820	63.6103279880	27.6107	-173.487	24.836	5.9011	6.1373	5.5877
HD 113538	HD 113538	6080301367488384896	0	K9V	4139.50	0.58	196.2339330283	-52.4463501608	61.3899	-786.038	-795.591	8.4428	9.3040	7.5603
HD 113996	HD 113996	1460876573902016768	1	K5III	3982.33	1.49	196.7948740236	27.6244383988	8.5952	35.450	-70.523	4.1448	5.0557	3.3647
HD 114386	HD 114386	6166971574132849792	0	K3V	4849.17	0.75	197.6652124193	-35.0561806801	35.7823	-137.097	-324.880	8.4182	8.9671	7.7657
HD 114613	HD 114613	6141742283401003264	0	G3V	5709.00	1.36	198.0111842232	-37.8028235874	49.2738	-381.634	46.091	4.6041	5.0448	4.1860
HD 114623	HD 114623	3936342650681095808	0	G0	5754.25	0.99	197.8744627589	15.7221055705	7.7705	-105.152	38.762	9.7165	10.0204	9.2836
HD 114729 A	HD 114729	6180035765135232128	1	G0V	5835.00	0.93	198.1833997359	-31.8746755909	26.4217	-200.158	-308.042	6.5138	6.8637	6.0573	HD 114729
HD 114762	HD 114762	3937211745904553600	1	F9V	5945.50	0.84	198.0796310194	17.5171240180	24.8556	-586.287	2.257	7.1396	7.4513	6.7087
HD 114783	HD 114783	3684934540986187776	0	K1V	5100.00	0.85	198.1818436419	-2.2649920574	47.4482	-138.403	10.228	7.3178	7.8011	6.7301
HD 11506	HD 11506	5137855525488932864	0	G0V	6116.00	1.19	28.2106606890	-19.5073960208	19.4792	21.907	-97.734	7.3738	7.6898	6.9490
HD 1160	HD 1160	2741090498161113344	1	A0V	9271.75	2.10	3.9888450990	4.2510497331	7.9417	20.089	-14.575	7.1074	7.1425	7.0900
HD 116029	HD 116029	1446584503287858560	1	K1IV	4923.30	1.33	200.1646905404	24.6484724852	8.0853	-14.495	-52.193	7.6091	8.1355	6.9768	HD 116029 A
HD 117207	HD 117207	6166183842771027328	0	G7IV-V	5643.50	1.03	202.3368805848	-35.5713041057	30.8785	-205.954	-71.515	7.0774	7.4627	6.5856
HD 117618	HD 117618	6083860761505899904	0	G0V	5974.00	1.05	203.1066418479	-47.2719048703	26.4417	25.247	-125.429	7.0216	7.3481	6.5896
HD 118203	HD 118203	1560420854826284928	0	K0	5828.67	1.23	203.5099559813	53.7281875610	10.8102	-85.877	-78.913	7.8925	8.2543	7.4211
HD 118865 A	HD 118865	3663438298389132416	0	F7V	6156.60	1.07	204.8926120270	1.0881599365	16.4485	-95.572	-48.426	7.8314	8.1296	7.4289
HD 118904	HD 118904	1687031134888475008	1	K2III	4454.80	1.40	204.2952907836	71.2422188681	8.1368	-36.934	-7.584	5.0957	5.7703	4.4102
HD 11964 A	HD 11964 A	2462426800883134336	1	G9V	5164.00	1.08	29.2884251682	-10.2434692948	29.7890	-366.957	-242.431	6.2037	6.6475	5.6332	HD 11964
HD 11977	HD 11977	4697508196671120000	0	G8IIIb	4936.50	2.31	28.7347403372	-67.6469871368	14.6943	75.680	73.609	4.3706	4.9336	3.8310
HD 120084	HD 120084	1715055487257379968	0	G7III	4901.33	2.40	205.6619889534	78.0646375956	9.6760	-65.088	46.199	5.6345	6.1667	5.0300
HD 121504	HD 121504	5872266689452551552	0	G2V	6004.25	1.18	209.3199062102	-56.0404084994	23.9754	-249.170	-84.789	7.3902	7.7155	6.9522
HD 122562	HD 122562	1247279294695842432	0	G5	5002.00	1.13	210.5886903984	20.8810286197	18.7496	110.226	-67.172	7.4131	7.9242	6.7966
HD 12484	HD 12484	2517585927699042944	1	G1/2V	5840.75	1.01	30.6115321514	2.8158078138	20.6595	36.368	-10.811	8.0446	8.3915	7.5847
HD 125390	HD 125390	1484890423248544256	0	G7III	4919.23	1.36	214.5387462742	38.9669132108	6.4798	-14.399	-15.998	7.9406	8.4577	7.3101
HD 125595	HD 125595	6104435819513399168	0	K4V	4742.13	0.76	215.3434325864	-40.3942443469	35.4337	-561.636	-68.516	8.6555	9.2568	7.9557
HD 125612	HD 125612	6296703260330865536	1	G3V	5867.00	1.10	215.2227182825	-17.4818147474	17.3261	-60.258	-67.373	8.1559	8.4965	7.6948
HD 126053 A	HD 126053	3654496279558010624	0	G1.5V	5715.50	0.87	215.8146491768	1.2395077456	57.3445	223.547	-478.325	6.0764	6.4375	5.6113
HD 12648	HD 12648	574577774218025600	0	G5	5004.33	1.20	34.7480718101	85.7365329077	5.4600	-9.674	86.793	6.7184	7.2250	6.1064
HD 126525	HD 126525	5898641087150340224	0	G4V	5667.30	0.90	216.8852513811	-51.9329117693	26.5312	-305.200	40.337	7.6698	8.0354	7.1825
HD 12661	HD 12661	105332908999068032	0	K0V	5656.00	1.07	31.1423524522	25.4135632018	26.3927	-108.181	-173.335	7.2475	7.6286	6.7626
HD 126614 A	HD 126614 A	3641697998570813952	1	G8IV	5491.67	1.14	216.7005171422	-5.1784093478	13.6519	-149.881	-145.915	8.6191	9.0358	8.0881	HD 126614
HD 128311	HD 128311	1176209886733406592	0	K3V	4863.47	0.83	219.0032291612	9.7454368349	61.2111	204.360	-250.390	7.1672	7.7017	6.5281
HD 128356	HD 128356	6223838830917236224	0	K2.5IV	4908.66	0.65	219.2702792937	-25.8031727642	38.2052	-18.393	-139.590	7.9774	8.5113	7.3391
HD 129445	HD 129445	5800013451037514496	0	G6V	5605.00	0.99	221.5104196493	-68.7629900602	14.7995	-197.786	-57.261	8.6178	9.0065	8.1094
HD 130322	HD 130322	3650718804281798912	0	K0V	5322.76	0.79	221.8857975154	-0.2820782191	31.3423	-130.798	-140.365	7.8345	8.2507	7.2995
HD 131496	HD 131496	1236429004715336576	0	K0	4896.00	1.61	223.3461495071	18.2352618162	7.5565	43.702	-34.116	7.5212	8.0549	6.8820
HD 13167	HD 13167	5121479777262042112	1	G3V	5684.75	1.35	32.0576350444	-24.6955749780	6.6859	43.770	-38.126	8.1600	8.5335	7.6676
HD 132406	HD 132406	1594127865540229888	0	G0V	5754.25	1.09	224.2276120938	53.3809615000	14.0987	-13.980	-280.386	8.2807	8.6330	7.8075
HD 132563 B	HD 132563 B	1585765117538284928	1	G1	6237.40	1.01	224.5877210667	44.0429924309	9.4960	-57.640	-70.175	9.3403	9.6376	8.9127	HD 132563B
HD 133131 A	HD 133131 A	6224633983987510528	1	G2V	5893.33	0.95	225.8984523705	-27.8431368902	19.3988	155.989	-133.720	8.2753	8.6090	7.8113
HD 133131 B	HD 133131 B	6224633983987511552	1	G2V	5771.80	0.93	225.8999744911	-27.8415946762	19.4648	158.954	-139.098	8.2567	8.5898	7.7965
HD 134060	HD 134060	5876112300125320448	0	G0V	5922.00	1.09	227.6847586886	-61.4223747002	41.6160	-185.588	-12.086	6.1333	6.4709	5.6940
HD 134113	HD 134113	1167602394315412864	0	F9	5820.00	0.81	226.9414982068	8.8795348907	13.8250	-516.828	-57.113	8.0928	8.4234	7.6342
HD 134606	HD 134606	5798962867668048768	1	G6IV	5586.50	1.00	228.8103896705	-70.5203327763	37.2972	-177.748	-164.774	6.6783	7.0725	6.1820
HD 134987	HD 134987	6226694571859532800	0	G6IV-V	5699.33	1.07	228.3675397361	-25.3096721447	38.1678	-400.308	-75.160	6.2855	6.6554	5.7979
HD 136118	HD 136118	4415515934099120768	0	F7V	6148.33	1.19	229.7306045564	-1.5922912564	19.4132	-123.748	22.522	6.7966	7.0923	6.3883
HD 136352	HD 136352	5902750168276592256	0	G3/5V	5826.25	0.81	230.4401147412	-48.3188173822	68.0818	-1624.047	-276.024	5.4618	5.8335	5.0029
HD 136418	HD 136418	1392396172224832896	0	G5	4962.77	1.33	229.7756437900	41.7324230361	9.4798	-20.058	-181.928	7.6095	8.1078	6.9954
HD 13724	HD 13724	4942867480584948352	0	G3/5V	5775.33	1.14	33.0859625909	-46.8166737873	22.9781	-30.714	-68.967	7.7300	8.0876	7.2615
HD 137388	HD 137388	5778418870846853888	0	K2IV	5197.50	0.86	233.9150820323	-80.2044169046	24.6722	-49.570	41.135	8.4800	8.9412	7.9065
HD 137510	HD 137510	1210681844007239040	0	G0IV-V	6006.50	1.36	231.4717118923	19.4806778959	23.2734	-54.611	-5.755	6.1020	6.4330	5.6625
HD 13808	HD 13808	4743692151804240896	0	K2V	5085.75	0.85	33.1780707558	-53.7437590554	35.3938	-107.923	30.975	8.1101	8.5870	7.5200
HD 13908	HD 13908	515574853541230720	0	F8	6135.00	1.29	34.5609101755	65.5941900742	12.5417	22.950	-39.152	7.3845	7.6775	6.9819
HD 13931	HD 13931	351537889154226816	0	G0	5837.50	1.02	34.1979991407	43.7722065056	21.0701	98.797	-183.625	7.4546	7.7916	6.9953
HD 139357	HD 139357	1597757387783227008	0	K4III	4587.50	1.35	233.8173563687	53.9221505495	8.8930	-18.767	1.760	5.6120	6.2419	4.9364
HD 1397	HD 1397	4707634458245031552	0	G5III/IV	5555.33	1.32	4.4471631361	-66.3589284641	12.5386	64.763	-5.056	7.5934	8.0076	7.0714
HD 14067	HD 14067	101040381244467968	0	G9III	4820.39	2.40	34.2933480188	23.7676546301	7.0125	-32.079	-40.993	6.2326	6.7888	5.5857
HD 141399	HD 141399	1398218223733415552	0	K0	5542.00	1.07	236.7235391635	46.9862880152	26.9857	-108.357	6.198	7.0093	7.4081	6.4986
HD 141937	HD 141937	6248534171318085376	0	G1V	5890.00	1.10	238.0735585150	-18.4359715644	29.9453	97.231	19.113	7.0915	7.4308	6.6384
HD 142 A	HD 142 A	4976894960284258048	1	F7V	6379.25	1.15	1.5836770885	-49.0753624933	38.1605	575.030	-40.690	5.5647	5.8559	5.2150	HD 142
HD 142022 A	HD 142022 A	5768159705804908800	1	G9IV-V	5487.00	0.99	242.5481730795	-84.2317494423	29.1424	-337.055	-31.202	7.5142	7.9208	6.9930	HD 142022
HD 142245	HD 142245	1193193836691820032	1	K0	4855.00	1.69	238.2342443181	15.4306118251	10.2562	-57.477	-21.764	7.1895	7.7268	6.5492	HD 142245 A
HD 142415	HD 142415	5833117718964892928	0	G1V	5950.00	1.09	239.4189889800	-60.2006947828	28.1149	-112.801	-101.835	7.1779	7.5136	6.7349
HD 143105	HD 143105	1646538011423566464	0	F5	6192.00	1.51	238.4023547023	68.7199778787	21.3482	2.196	-31.695	6.6258	6.9164	6.2346
HD 143361	HD 143361	5991331601015519104	0	G6V	5470.00	0.95	240.4588405211	-44.4350574890	14.5670	-156.502	-120.222	9.0160	9.4163	8.4911
HD 145377	HD 145377	6042491773948918656	0	G3V	5885.93	1.12	242.9019657873	-27.0781199290	18.6669	21.786	13.039	7.9700	8.2905	7.5264
HD 145457	HD 145457	1315900158983769472	0	K0III	4738.00	1.90	242.5162214830	26.7429068036	7.3625	-18.336	36.824	6.2786	6.8361	5.6187
HD 1461	HD 1461	2430102808294101760	0	G3V	5764.50	1.02	4.6762644712	-8.0536206078	42.6090	417.875	-143.768	6.2902	6.6514	5.8179
HD 147018	HD 147018	5831054382288870912	0	G8V	5474.50	0.93	245.7490011803	-61.6901290853	24.7079	-177.498	-316.244	8.1114	8.5120	7.5875
HD 147379	HD 147379	1642641410934267008	1	M1Ve	3820.11	0.58	244.1725685927	67.2392040960	92.8704	-498.018	84.110	7.9005	8.8199	6.9798
HD 147513 A	HD 147513	6018047019138644480	1	G5V	5882.50	0.92	246.0057894001	-39.1929660542	77.4716	74.146	3.666	5.1938	5.5641	4.7751	HD 147513
HD 14787	HD 14787	24570756281835392	0	G5	5038.70	1.43	35.8085098681	10.8367971537	8.3653	-11.105	11.812	7.3784	7.8810	6.7747
HD 147873	HD 147873	6024733935303422208	1	G1V	6016.25	1.38	246.4380471379	-33.5672217301	9.1422	-18.708	-22.797	7.8183	8.1262	7.3918
HD 148156	HD 148156	5942178414758660864	0	G0V	6213.33	1.22	247.0723034553	-46.3175084729	17.4755	45.591	27.928	7.5551	7.8527	7.1421
HD 148164	HD 148164	4459907547841472128	0	F8	6022.00	1.21	246.4351678251	11.9190729422	12.9252	-88.510	1.570	8.0907	8.3926	7.6703
HD 148284	HD 148284	1318110830190386048	0	G0	5556.00	1.07	246.4516038761	30.2647738649	8.2231	-25.822	-81.997	8.8349	9.2230	8.3242
HD 148427	HD 148427	4330532859324207360	0	K0III/IV	5020.14	1.45	247.1171310957	-13.3996230951	13.9869	-37.203	2.888	6.6354	7.1359	6.0266
HD 149026	HD 149026	1331356474971716992	0	G0IV	6075.75	1.30	247.6229826882	38.3475349008	13.1526	-77.899	52.564	8.0142	8.3239	7.5878
HD 149143	HD 149143	4432401099808805888	0	G3V	5823.00	1.10	248.2126715128	2.0844547069	13.6179	-9.328	-86.739	7.7408	8.0828	7.2789
HD 1502	HD 1502	2768172019308167296	0	K0	4924.95	1.61	4.8214388511	14.0546829778	5.2095	74.113	-16.945	8.1042	8.6024	7.4893
HD 150433	HD 150433	4354950641755249024	0	G5V	5748.60	1.00	250.2841126840	-2.8591930600	32.8259	-26.810	-444.697	7.0411	7.3945	6.5660
HD 150706	HD 150706	1709456705329541504	0	G0	5920.67	0.94	247.8255686552	79.7894031788	35.3446	94.884	-86.971	6.8504	7.1891	6.4089
HD 152079	HD 152079	5939949051801737472	0	G6V	5722.50	1.02	253.3732313320	-46.3333581590	11.3494	-107.278	-93.478	9.0105	9.3694	8.5296
HD 152581	HD 152581	4448227641977175296	0	K0	5042.00	0.93	253.4316450993	11.9736827988	6.0044	11.596	-15.086	8.1275	8.6138	7.5213
HD 15337	HD 15337	5068777809824976256	0	K1V	5165.50	0.90	36.8678845697	-27.6361171487	22.2848	-73.590	-211.614	8.8560	9.3194	8.2708	TOI-402
HD 153950	HD 153950	5965406010180880640	0	F8V	5988.25	1.12	256.1292826385	-43.3103753428	20.6090	110.494	-140.694	7.2381	7.5507	6.8089
HD 154088	HD 154088	6029992663310612096	0	K0IV-V	5339.00	0.97	256.1164214427	-28.5838342002	54.7080	83.229	-268.601	6.3631	6.7989	5.8237
HD 154345	HD 154345	1359938520253565952	0	G9	5540.00	0.89	255.6524619354	47.0855543561	54.6636	123.204	853.742	6.5677	6.9708	6.0570
HD 154672	HD 154672	5917231492323978880	0	G3IV	5698.37	1.06	257.5206969991	-56.4498040884	15.8321	30.390	-123.968	8.0373	8.4057	7.5441
HD 154857	HD 154857	5917212800626605824	0	G5V	5582.50	1.72	257.8161939978	-56.6810380413	15.7321	87.585	-55.891	7.0484	7.4321	6.5469
HD 155233	HD 155233	4116106136072676608	1	K1III	4906.86	1.50	257.7681390996	-20.6551640445	13.4431	-9.847	-138.389	6.5449	7.0730	5.9001
HD 155358	HD 155358	1334643739861016832	0	G0	5987.33	0.92	257.3930946827	33.3549277361	22.8965	-222.459	-215.908	7.1207	7.4379	6.6926
HD 156279	HD 156279	1631084478574318976	0	K0	5487.00	0.93	258.0966686362	63.3527827662	27.5995	-2.026	160.207	7.8657	8.2814	7.3399
HD 156411	HD 156411	5950535424666050304	0	G1V	5908.00	1.25	259.9639521651	-48.5502313354	17.5567	-33.184	-211.549	6.5121	6.8472	6.0589
HD 156668	HD 156668	4575374857376398976	0	K3V	4831.50	0.77	259.4183490859	29.2281610394	41.0687	-72.627	216.769	8.1075	8.6627	7.4457
HD 156846	HD 156846	4122343906051101184	1	G1V	6082.00	1.38	260.1423366109	-19.3343650156	20.9210	-137.102	-143.204	6.3585	6.6752	5.9329
HD 157172	HD 157172	4122133830616441728	0	G8.5V	5466.00	0.95	260.6440359475	-19.6167773279	30.2729	2.428	-138.508	7.6457	8.0562	7.1223
HD 158038	HD 158038	4574156834713113600	1	K1IV	4842.00	1.65	261.4395312459	27.3030720823	10.5127	44.616	-57.205	7.2068	7.7351	6.5771
HD 158259	HD 158259	1416050859226670848	0	G0	5928.00	1.08	261.3495846904	52.7904720851	36.9399	-91.047	-49.639	6.3027	6.6387	5.8575
HD 159243	HD 159243	4485937214320449280	0	G0	6079.05	1.12	263.3395364743	5.7008254475	13.6128	-54.948	21.769	8.5119	8.8143	8.0866
HD 159868	HD 159868	5955841736510622208	0	G5V	5576.50	1.09	264.7466665305	-43.1462346521	17.8763	-230.510	-167.766	7.0458	7.4424	6.5378
HD 1605	HD 1605	2862328869351558272	0	K1IV	4909.50	1.31	5.1317548359	30.9750610918	11.2320	84.836	59.262	7.2569	7.7736	6.6353
HD 160508	HD 160508	4594158089392172928	0	F8V	6107.50	1.25	264.8030678955	26.7572531883	8.9285	34.307	-66.686	7.9722	8.2715	7.5603
HD 16141 A	HD 16141	2495335115182966016	1	G2V	5733.67	1.01	38.8323674299	-3.5624887490	26.4360	-155.582	-437.987	6.6577	7.0197	6.1935	HD 16141
HD 16175	HD 16175	340028235795364864	0	G2	5890.00	1.34	39.2577379063	42.0624526091	16.6775	-38.835	-41.306	7.1291	7.4676	6.6829
HD 162020	HD 162020	5957920668132624256	0	K3V	4801.11	0.75	267.6599251999	-40.3184645845	32.4128	20.276	-25.320	8.7595	9.3423	8.0681
HD 163607	HD 163607	1418519292895059840	0	G5IV	5524.25	1.09	268.4181383189	56.3924700681	14.7236	-75.837	119.576	7.8130	8.2182	7.2930
HD 16417	HD 16417	5062172841616745856	1	G1V	5817.00	1.18	39.2441029388	-34.5790905323	39.3512	-18.507	-258.869	5.5944	5.9559	5.1342
HD 164509	HD 164509	4275421969292868224	1	G2V	5929.15	1.13	270.3800810972	0.1044685315	18.7994	-7.864	-20.380	7.9559	8.2931	7.4938
HD 164595	HD 164595	4584639307993378432	1	G2V	5762.00	0.99	270.1613723334	29.5726698192	35.3642	-139.130	173.475	6.8947	7.2513	6.4261
HD 164604	HD 164604	4062446910648807168	0	K3.5V	4684.00	0.80	270.7787176997	-28.5608343453	25.3757	-34.759	-41.681	9.3279	9.9180	8.6368
HD 164922	HD 164922	4582680493669880704	0	G9V	5342.25	0.87	270.6304652351	26.3104076572	45.4222	389.653	-602.314	6.7861	7.2171	6.2430
HD 165155	HD 165155	4050284898932499072	0	G8V	5343.25	1.02	271.4893394774	-29.9172536272	15.7548	76.940	-1.485	9.2141	9.6305	8.6751
HD 1666	HD 1666	2362099457224379136	1	F7V	6264.50	1.50	5.2180424318	-19.9314822508	8.4527	-8.501	-59.564	8.0512	8.3262	7.6667
HD 166724	HD 166724	6724520279784564864	0	K0IV/V	5101.00	0.81	273.4988604204	-42.5757218133	22.1273	36.110	-80.147	9.0686	9.5414	8.4808
HD 167042	HD 167042	2149564787289902848	0	K1III	5016.00	1.72	272.6326267926	54.2876184093	20.1069	107.225	247.292	5.7084	6.2159	5.1109
HD 168443	HD 168443	4157584215800708736	0	G6V	5578.00	1.00	275.0159878767	-9.5966904808	25.2084	-91.685	-224.285	6.7317	7.1261	6.2372
HD 168746	HD 168746	4153637759337630720	0	G5V	5641.50	0.88	275.4573268500	-11.9229756758	24.0282	-23.099	-68.299	7.7717	8.1497	7.2779
HD 169830	HD 169830	4048037707717866880	3	F7V	6196.75	1.41	276.9561859111	-29.8167918758	26.5642	-0.489	16.453	5.7624	6.0565	5.3717
HD 170469	HD 170469	4484013343859055744	1	G5	5703.00	1.14	277.2955422827	11.6954243614	16.5886	-48.418	-17.470	8.0495	8.4088	7.5806
HD 171028	HD 171028	4477318138371083008	0	G0	5662.25	0.99	278.0643694260	6.9456827351	8.9274	-42.869	-14.705	8.1023	8.4763	7.6113
HD 171238	HD 171238	4048636941542753152	0	G8V	5436.33	0.94	278.6818388756	-28.0727849211	22.2871	-29.578	-109.110	8.4110	8.8268	7.8831
HD 17156	HD 17156	545560867790611072	0	G0	5925.00	1.27	42.4366123113	71.7530882374	12.7776	90.982	-33.197	8.0330	8.3516	7.5966
HD 173416	HD 173416	2096524140211914368	0	G8	4780.00	2.00	280.9005675944	36.5568569567	7.5367	20.784	58.295	5.7423	6.3027	5.0965
HD 175167	HD 175167	6421118739093252224	0	G5IV/V	5529.20	1.10	285.0033888163	-69.9450663648	14.0386	-7.044	-191.511	7.8242	8.2186	7.3104
HD 175541	HD 175541	4281180283478682496	0	G6/8IV	5048.69	1.65	283.9203210694	4.2649343813	7.6877	-6.744	-90.226	7.7593	8.2462	7.1598
HD 175607	HD 175607	6434759761383343744	0	G6V	5522.00	0.71	285.2742900708	-66.1943378556	24.7663	133.112	-385.409	8.4096	8.7950	7.8945
HD 176051	HD 176051A	2043885295912608512	1	F9V	5932.00	1.07	284.2576611101	32.9007393239	66.5742	165.432	-132.864	5.1169	5.4284	4.6552
HD 17674	HD 17674	129321160344480512	0	G0V	5909.00	0.98	42.7684964219	30.2865981236	22.4803	128.315	-32.948	7.4011	7.7263	6.9573
HD 176986	HD 176986	4199396753205879040	0	K2.5V	4979.07	0.79	285.7739137914	-11.0449410474	35.9627	-126.942	-235.907	8.1425	8.6548	7.5300
HD 177565	HD 177565	6718894388002453120	0	G6V	5677.00	1.00	286.7175787070	-37.8122393785	59.0802	-187.641	-367.029	5.9647	6.3406	5.4834
HD 177830 A	HD 177830	2035963417721248128	1	K0	4847.50	1.47	286.3363574392	25.9204326763	15.9030	-41.335	-52.433	6.8866	7.4381	6.2386	HD 177830
HD 178911 B	HD 178911 B	2044341077844180736	1	G5	5596.00	1.07	287.2632091491	34.6006971502	24.3775	57.177	195.900	7.8670	8.2581	7.3599
HD 179079	HD 179079	4261265619668314624	0	G5IV	5674.50	1.09	287.7903733365	-2.6387703331	14.3167	-134.422	-89.424	7.7745	8.1505	7.2788
HD 179949	HD 179949	6770313530317154560	0	F8V	6153.00	1.28	288.8890182131	-24.1797938960	36.3915	118.552	-102.235	6.1039	6.4039	5.6949
HD 180053	HD 180053	2050321081068398720	0	K0	5138.00	1.75	288.4008374178	34.9146657659	7.2682	-10.135	28.850	7.7033	8.1770	7.1158
HD 18015	HD 18015	5173468908975401856	1	G6IV	5700.33	1.49	43.3636339221	-8.8480391764	8.0490	63.053	-4.359	7.7219	8.0986	7.2300
HD 180314	HD 180314	2042983077905233792	0	K0	4910.00	2.60	288.7094401116	31.8604390936	8.1437	46.712	20.727	6.3419	6.8683	5.7203
HD 180617	HD 180617	4293318823182081408	1	M3-V	4117.67	0.45	289.2277322388	5.1631614875	169.1590	-579.043	-1332.743	8.0976	9.3755	6.9939	GJ 752 A
HD 180777	HD 180777	2292498687560557056	0	A7V	7084.75	1.70	287.2921433677	76.5599895436	36.4059	52.870	-119.092	5.0068	5.2160	4.7829
HD 180902	HD 180902	6770721346051487872	0	K0III/IV	4929.00	1.52	289.8239604057	-23.5582431971	9.5339	37.839	-20.148	7.5213	8.0225	6.9103
HD 181234	HD 181234	4201307051566729984	1	G8IV	5331.30	1.01	289.9998695114	-9.3249699914	20.9155	-122.751	-318.277	8.3693	8.8084	7.8159
HD 181342	HD 181342	6770761168986617600	0	K0III	4936.59	1.84	290.2674077570	-23.6196996499	8.2778	-46.597	-30.158	7.2841	7.8086	6.6601
HD 181433	HD 181433	6434153380720177664	0	K3III-IV	4843.40	0.78	291.2873730573	-66.4677838476	37.1787	-230.931	235.775	8.0923	8.6302	7.4458
HD 181720	HD 181720	6745589980571162752	0	G1V	5864.00	0.92	290.7212223508	-32.9208401155	16.5816	88.154	-415.038	7.6748	8.0167	7.2202
HD 183263	HD 183263	4296208099222829568	0	G2IV	5887.00	1.12	292.1022982320	8.3579182837	18.4229	-19.127	-32.162	7.7182	8.0562	7.2670
HD 185269	HD 185269	2031479093959232128	1	G2V	5962.00	1.28	294.2987668360	28.4995139839	19.2049	-31.499	-80.782	6.5183	6.8412	6.0848	HD 185269 A
HD 187085	HD 187085	6692069568458919040	0	G0V	6026.00	1.22	297.3915731059	-37.7809928601	21.7580	8.465	-103.249	7.0751	7.3854	6.6539
HD 187123	HD 187123	2047452661412980736	0	G2V	5781.75	1.04	296.7428786009	34.4189900059	21.7316	142.581	-123.603	7.6728	8.0203	7.2085
HD 18742	HD 18742	5079636934554540160	0	G8IV	5047.00	1.60	45.0443115023	-20.8027023907	6.1211	-19.724	-22.861	7.5546	8.0553	6.9473
HD 188015 A	HD 188015	2028419118720795392	1	G5IV	5687.00	1.09	298.0191856562	28.0999768636	19.7065	52.544	-91.934	8.0659	8.4345	7.5762	HD 188015
HD 189567	HD 189567	6427244702486210816	0	G2V	5796.33	1.00	301.3959615858	-67.3237992495	55.8197	845.346	-674.028	5.8992	6.2541	5.4314
HD 189733 A	HD 189733	1827242816201846144	1	K2V	5014.84	0.80	300.1821222829	22.7097759246	50.5685	-3.294	-250.225	7.4143	7.9130	6.8080	HD 189733
HD 190228	HD 190228	2029001447540053504	0	G5IV	5356.00	1.82	300.7537293520	28.3065563726	15.9164	104.146	-69.806	7.0848	7.5166	6.5345
HD 190360	HD 190360	2029433521248546304	1	G7IV-V	5566.50	1.04	300.9092475709	29.8945409794	62.4443	683.341	-525.675	5.5336	5.9384	5.0336	Gliese 777 A
HD 190647	HD 190647	6697758334244808192	0	G5V	5612.50	1.10	301.8318167190	-35.5395235820	18.3287	-26.622	-206.859	7.5942	7.9842	7.0911
HD 190984	HD 190984	6429295051154269440	3	F8V	5915.60	0.91	302.8779827020	-64.6202728236	6.7198	0.282	45.480	8.6113	8.9199	8.1737
HD 191806	HD 191806	2088526979830768512	0	K0	5900.67	1.14	302.3687580014	52.2767264728	15.1995	114.051	91.193	7.9334	8.2690	7.4850
HD 191939	HD 191939	2248126315275354496	0	G0	5555.67	0.92	302.0256246618	66.8503013828	18.6247	150.256	-63.909	8.7748	9.1732	8.2481
HD 192263	HD 192263	4224259562941398400	0	K1/2V	4996.00	0.81	303.4990864481	-0.8657574365	50.8982	-62.671	260.961	7.4956	8.0090	6.8748
HD 192699	HD 192699	4246124829130366848	0	G8IV	5086.73	1.69	304.0248391550	4.5805707733	13.8868	-41.239	-52.035	6.2056	6.6786	5.6146
HD 19467	HD 19467	5155981730587168384	0	G3V	5718.00	0.95	46.8273574860	-13.7629049913	31.2255	-8.685	-260.566	6.7984	7.1622	6.3342
HD 195019 A	HD 195019	1815418118373631360	1	G1V	5768.25	1.06	307.0792426846	18.7692508657	26.5188	349.644	-56.571	6.7291	7.0816	6.2596	HD 195019
HD 196050 A	HD 196050	6454954010413575296	1	G3V	5833.80	1.17	309.4637795970	-60.6347648954	19.7051	-191.122	-64.922	7.3407	7.6834	6.8802	HD 196050
HD 196067	HD 196067	6369544118965772416	1	G0V	6020.50	1.29	310.4364195197	-75.3514992113	25.0120	156.596	-162.079	6.3260	6.6564	5.8891
HD 196885 A	HD 196885 A	1754430373040023168	1	F8V	6147.10	1.33	309.9664608904	11.2500236041	29.2372	71.470	89.165	6.2567	6.5459	5.8522	HD 196885
HD 197037	HD 197037	2066437688140905600	1	G0	6259.00	1.11	309.8869680992	42.2475929918	30.0966	-62.898	-221.859	6.6711	6.9587	6.2772	HD 197037 A
HD 19994 A	HD 19994	3265335443260522112	1	F8.5V	6071.00	1.34	48.1943193450	-1.1963955226	44.3695	193.250	-69.293	4.8849	5.2327	4.5306	HD 19994
HD 20003	HD 20003	4642472794978268800	0	G8V	5510.00	0.88	46.9090080934	-72.3219221021	23.8764	71.893	-7.995	8.1918	8.5908	7.6767
HD 200964	HD 200964	1732018855730384256	0	G8IV	5079.00	1.44	316.6664182727	3.8033356551	13.7469	94.608	50.604	6.2323	6.7135	5.6336
HD 202432	HD 202432	2270923795523915136	0	K2	4607.44	1.20	317.9186734512	70.4412643499	6.1736	22.100	28.109	6.5328	7.1628	5.8309
HD 202696	HD 202696	1847742385838236416	0	K0III-IV	4951.40	1.91	319.2250345688	27.2582799435	5.2754	47.157	36.695	7.9593	8.4828	7.3217
HD 202772 A	HD 202772 A	6790773586275235200	1	F8	6485.60	1.72	319.6995876725	-26.6163742655	6.1655	23.236	-57.557	8.2269	8.4308	7.7657
HD 203030	HD 203030	1846882224145757056	0	K0V	5472.33	0.97	319.7432238147	26.2305845570	25.4488	133.593	9.563	8.2466	8.6478	7.7260
HD 203473	HD 203473	1738397638078725248	0	G6V	5846.75	1.12	320.5794196373	5.0235857935	13.7379	179.901	-0.500	8.0769	8.4236	7.6063
HD 20367	HD 20367	122704230645584768	0	F8V	6100.00	1.04	49.4163490373	31.1267946790	38.2842	-101.802	-57.909	6.2551	6.5712	5.8380
HD 2039	HD 2039	4919009555730599936	0	G2/3IV/V	5863.00	0.98	6.0851069387	-56.6499880147	11.6408	78.454	14.512	8.8597	9.1953	8.4025
HD 204313	HD 204313	6828450688663428224	0	G5V	5741.50	1.02	322.0510568043	-21.7274193773	20.8943	42.759	-270.523	7.8325	8.1945	7.3529
HD 204941	HD 204941	6830027182179257472	1	K2V	4958.40	0.74	323.0966714378	-20.9579570496	34.7945	-279.074	-124.241	8.1909	8.6685	7.5945
HD 205739	HD 205739	6592695123423391616	0	F7V	6157.40	1.22	324.5351272527	-31.7378372888	10.7826	21.914	-82.166	8.4199	8.7059	8.0152
HD 206255	HD 206255	6561908626047094144	0	G5IV/V	5635.00	1.42	325.5917767975	-50.0935883975	13.2626	83.050	5.139	7.4485	7.8258	6.9545
HD 206610	HD 206610	2667434008056899712	0	K0III	4843.98	1.56	325.8537599304	-7.4082451016	6.7670	1.979	1.918	8.0651	8.6060	7.4267
HD 206893	HD 206893	6843672087120107264	0	F5V	6511.67	1.24	326.3416873593	-12.7833521713	24.5062	93.776	0.016	6.5678	6.8157	6.2264
HD 20781	HD 20781A	5060105892897388288	1	G9.5V	5342.00	0.84	50.0139756930	-28.7841175097	27.7709	348.847	-66.663	8.2372	8.6705	7.6802
HD 20782	HD 20782	5060104351007433472	1	G1.5V	5795.00	1.02	50.0166231640	-28.8543534945	27.7593	349.057	-65.299	7.1928	7.5420	6.7239
HD 207832	HD 207832	6812056381881853056	1	G5V	5737.25	0.94	328.1517893472	-26.0271749496	16.9408	129.088	-143.004	8.6118	8.9734	8.1267	HD 207832 A
HD 20794	HD 20794	4847957293277762560	0	G6V	5751.00	0.70	49.9997665921	-43.0666532656	166.5610	3033.728	730.775	3.9813	4.4699	3.5530
HD 208487	HD 208487	6586580842340695040	0	G1/3V	6067.00	1.30	329.3332489126	-37.7641353673	22.1214	101.138	-118.666	7.3316	7.6371	6.9112
HD 20868	HD 20868	5053536074700031616	0	K3/4III/V	4844.29	0.78	50.1794053107	-33.7296899561	20.9257	292.467	96.138	9.6132	10.1810	8.9387
HD 208897	HD 208897	1779772947826839808	0	K0	4935.39	1.25	329.7490639109	19.0201590544	14.7889	76.559	-33.258	6.2325	6.7586	5.6100
HD 209458	HD 209458	1779546757669063552	0	F9V	6076.55	1.15	330.7950219303	18.8842419299	20.6745	29.579	-17.890	7.5087	7.8127	7.0896
HD 210193	HD 210193	6570039342736534784	0	G3V	5790.00	1.04	332.3951323536	-41.2252049855	23.6662	159.435	-72.269	7.6687	8.0169	7.2013
HD 210277	HD 210277	2619706544757416192	0	G8V	5534.67	1.09	332.3748116761	-7.5505962369	46.9229	85.462	-450.544	6.3431	6.7504	5.8324
HD 210702	HD 210702	1775004778213735168	0	K0III	4979.67	1.68	332.9638643327	16.0404805511	18.4231	-3.241	-17.156	5.6640	6.1757	5.0720
HD 211810	HD 211810	2201556328489610752	0	G5	5660.00	1.03	334.5286724132	61.1349911700	15.4425	159.797	128.877	8.4178	8.7902	7.9215
HD 211970	HD 211970	6508401923473282432	0	K7V	4126.74	0.61	335.5661578805	-54.5596005904	76.1461	-184.148	235.119	8.4044	9.2236	7.5508
HD 212301	HD 212301	6356860393345181824	1	F8V	6117.00	1.05	336.8803956531	-77.7183219382	18.4109	76.862	-92.203	7.6349	7.9327	7.2304	HD 212301 A
HD 212771	HD 212771	2595360569884153728	0	G8IV	5069.00	1.15	336.7624129660	-17.2641045789	8.9678	-86.053	-104.084	7.3521	7.8393	6.7657
HD 213240 A	HD 213240	6517058790835773440	1	G0/1V	5921.00	1.22	337.7506265869	-49.4341037126	24.4385	-136.026	-193.926	6.6576	6.9901	6.2137	HD 213240
HD 213885	HD 213885	6407428994690988928	0	G0/2V	5778.75	1.07	338.9837166317	-59.8648289951	20.7663	-108.388	-84.419	7.8017	8.1340	7.3391
HD 21411	HD 21411	5056511692465250304	0	G8V	5605.00	0.89	51.5474154645	-30.6168403135	34.2967	218.073	226.095	7.6818	8.0718	7.1672
HD 214823	HD 214823	1889143121789650176	1	G0	5968.00	1.22	340.0832062011	31.7875182991	9.8365	81.220	-18.053	7.9159	8.2389	7.4759
HD 215152	HD 215152	2623505219992303104	0	K3V	4864.92	0.77	340.8380940513	-6.4020685094	46.2733	-154.145	-289.737	7.8016	8.3371	7.1626
HD 215456	HD 215456	6514371309538745600	1	G0.5V	5817.67	1.04	341.5348380571	-48.9790293764	25.2196	207.608	-47.958	6.4683	6.8180	6.0058
HD 215497	HD 215497	6504232472302122624	0	K3V	4993.93	0.87	341.6527139837	-56.5997984424	24.6339	-54.660	-61.028	8.6860	9.1913	8.0680
HD 216435	HD 216435	6515731817739456256	0	G0V	5928.00	1.30	343.4094703215	-48.5986332144	30.2896	218.016	-80.961	5.8723	6.2085	5.4311	tau Gru
HD 216437	HD 216437	6384510877400590336	0	G1V	5870.00	1.06	343.6639630693	-70.0733957463	37.4380	-43.479	73.028	5.8830	6.2416	5.4312
HD 216770	HD 216770	6610107504955838336	0	G9V	5385.33	0.90	343.9748751045	-26.6595286128	27.2472	226.442	-177.741	7.9164	8.3385	7.3780
HD 21693	HD 21693	4729947569262040960	0	G9IV-V	5458.33	0.80	51.8040469493	-58.3232725825	30.0417	248.654	94.648	7.7570	8.1619	7.2349
HD 217107	HD 217107	2648914040357320576	0	G8IV/V	5630.00	1.11	344.5647243461	-2.3954489346	49.8170	-7.108	-14.777	5.9546	6.3731	5.4824
HD 217786	HD 217786	2650902026099857920	1	F8V	5937.00	1.02	345.7838087790	-0.4303593995	17.9946	-89.933	-168.781	7.6357	7.9569	7.1995
HD 217850	HD 217850	2013333544271181824	0	G8V	5504.50	1.03	345.6526587725	58.8754484141	15.1744	-19.138	-124.094	8.3207	8.7251	7.8037
HD 218566	HD 218566	2638410646295370880	0	K3V	4844.50	0.85	347.2974170226	-2.2611644990	34.6603	631.520	-97.214	8.2743	8.8251	7.6208
HD 219077	HD 219077	6489771832811810432	0	G8V	5330.13	1.05	348.5319387261	-62.7018297119	34.2337	478.174	-424.148	5.9055	6.3364	5.3709
HD 219134	HD 219134	2009481748875806976	0	K3V	4787.33	0.81	348.3372026316	57.1696255296	153.0808	2074.517	294.936	5.2079	5.7882	4.5804
HD 219415	HD 219415	2009255593080688640	0	K	4847.70	1.00	348.7243578811	56.7303000619	6.0252	11.928	-5.708	8.5975	9.1515	7.9359
HD 219666	HD 219666	6492940453524576128	0	G5V	5493.50	0.92	349.5592664696	-56.9039857470	10.5900	313.918	-20.177	9.6496	10.0349	9.1331
HD 219828	HD 219828	2824958015312906240	0	G0IV	5831.50	1.23	349.6947028769	18.6457524314	13.6489	-5.075	6.037	7.8834	8.2253	7.4187
HD 220197	HD 220197	2817634821194781824	0	G5	5672.06	0.91	350.4946927185	16.6323305386	15.4965	407.248	-48.265	8.7448	9.0889	8.2721
HD 220689	HD 220689	2391838429257482496	0	G3V	5944.00	1.01	351.4707282266	-20.6167923237	21.3033	-15.737	-177.493	7.5944	7.9271	7.1527
HD 220773	HD 220773	2761142326076104192	0	G0	5932.00	1.16	351.6144714684	8.6428871310	19.7694	27.119	-222.294	6.9459	7.2771	6.5039
HD 220842	HD 220842	1997273733835247616	1	F8	5956.35	1.13	351.6534161614	56.8871414553	15.4391	-89.123	143.120	7.8340	8.1581	7.3932	HD 220842 A
HD 221287	HD 221287	6489603813690967808	0	F7V	6191.00	1.25	352.8362230451	-58.2097540446	17.8529	181.160	-5.297	7.6815	7.9594	7.2869
HD 221416	HD 221416	2388463203438164096	0	K0IV/V	5084.00	1.21	353.0331862555	-21.8012007207	10.4380	-96.775	51.240	7.9078	8.3867	7.3146
HD 221420	HD 221420	6353376831270492800	0	G2IV-V	5773.50	1.67	353.3319001374	-77.3853285968	32.0826	16.304	0.833	5.6412	6.0070	5.1786
HD 221585	HD 221585	2016655237613545728	0	G8IV	5538.50	1.19	353.2293801772	63.1556145700	17.8751	439.148	30.765	7.2813	7.6808	6.7690
HD 222076	HD 222076	6386468454774591744	0	K1III	4866.99	1.07	354.5319819930	-70.9032461119	10.9415	-85.079	25.569	7.1876	7.7293	6.5527
HD 222155	HD 222155	1943363751009454976	0	G0	5720.00	1.13	354.5025616689	48.9960191388	19.7309	195.300	-117.266	6.9356	7.2949	6.4588
HD 222582 A	HD 222582	2440578577126302336	1	G5V	5793.00	0.99	355.4640788476	-5.9862379446	23.6913	-145.401	-111.296	7.5189	7.8714	7.0513	HD 222582
HD 224538	HD 224538	6488009143872441216	0	F9V/V	6101.50	1.54	359.7164301715	-61.5868612885	12.6196	82.798	-20.666	7.9219	8.2286	7.5048
HD 224693	HD 224693	2340155679036275200	0	G2V	5971.29	1.33	359.9749836855	-22.4279999230	10.6666	147.125	26.853	8.0853	8.4170	7.6323
HD 22781	HD 22781	217334764042444288	0	K0	5091.00	0.75	55.2065580713	31.8258855371	30.6433	40.576	-94.254	8.5244	9.0068	7.9291
HD 23079	HD 23079	4733035238430992768	0	F9.5V	5964.25	1.10	54.9281896630	-52.9162343822	29.8583	-192.877	-92.103	6.9624	7.2849	6.5308
HD 23127	HD 23127	4680773217379728128	0	G2V	5752.00	1.13	54.8491270944	-60.0772290375	10.6258	73.621	142.847	8.4202	8.7791	7.9453
HD 231701	HD 231701	4321678767076043264	0	F8V	6080.50	1.14	293.0176220460	16.4743565765	9.1560	63.363	15.650	8.8305	9.1227	8.4169
HD 233832	HD 233832	790236569003888000	1	K2	5009.00	0.71	171.5196515219	50.3763099282	16.9952	-473.960	124.167	9.9456	10.4186	9.3465
HD 23472	HD 23472	4674216245427964416	1	K3.5V	4826.33	0.75	55.4590313743	-62.7672667497	25.5897	-102.571	-43.917	9.3848	9.9593	8.7035
HD 23596	HD 23596	224870885460646016	1	F8	5958.00	1.27	57.0018600953	40.5307307913	19.2012	53.007	21.310	7.1036	7.4258	6.6710
HD 24040	HD 24040	43802039287826432	0	G1	5805.00	1.18	57.5962103759	17.4752873172	21.4203	113.215	-251.033	7.3348	7.6865	6.8685
HD 24085	HD 24085	4666907516760096512	1	G0V	6034.00	1.22	56.2563447125	-70.0245192950	18.1859	-9.249	-97.358	7.4250	7.7532	6.9939
HD 25015	HD 25015	5094032153102626688	0	K2V	5078.90	0.86	59.4335462630	-20.2673347365	26.6856	118.715	106.331	8.5988	9.0666	8.0087
HD 25171	HD 25171	4670023700215616768	1	F8V	6127.00	1.09	58.9574778977	-65.1863238664	17.9520	143.943	81.497	7.6380	7.9313	7.2327
HD 2638	HD 2638	2526925389919277056	1	K1V	5131.41	0.87	7.4990037916	-5.7649599584	18.1656	-107.019	-223.039	9.1927	9.6575	8.5798
HD 2685	HD 2685	4684205720883329920	0	F2III/IV	6698.23	1.43	7.3289156359	-76.3040320440	5.0511	-2.970	6.961	9.5203	9.7518	9.1805
HD 26965	HD 26965	3195919528988725120	1	K0V	5196.00	0.78	63.8082666493	-7.6676026596	198.5657	-2240.519	-3421.429	4.1071	4.6332	3.6023
HD 27442 A	HD 27442 A	4678664766394767616	1	K2III	4677.00	1.20	64.1205476298	-59.3028770510	54.7051	-48.302	-167.799	4.0639	4.6931	3.4790	HD 27442, epsilon Ret
HD 27631	HD 27631	4840050395924931968	0	G3IV/V	5732.50	0.94	64.9392167521	-41.9606603739	19.8573	-41.229	-91.988	8.0848	8.4496	7.6080
HD 27894	HD 27894	4678605152248591488	0	K2V	4829.94	0.80	65.1975692672	-59.4096776416	22.7910	182.313	269.911	9.0657	9.6044	8.4215
HD 28185	HD 28185	3179384931394690304	0	G6.5IV/V	5665.00	1.24	66.6100461267	-10.5510754474	25.3642	84.071	-59.750	7.6268	8.0065	7.1342
HD 28254	HD 28254	4781553628548774656	1	G5V	5545.00	1.06	66.2108141338	-50.6228081156	18.0581	-67.394	-143.595	7.4998	7.8938	7.0004	HD 28254 A
HD 283668	HD 283668	149340032971718912	0	K2	4886.44	0.68	66.9723280815	24.4451958474	33.9873	395.967	53.392	9.1079	9.6305	8.4584
HD 283869	HD 283869	154257259425702144	0	K7	4495.06	0.74	71.9247120009	26.1498673871	21.0030	113.234	-83.790	10.1518	10.8259	9.3940
HD 285507	HD 285507	45159901786525568	0	K4	4452.78	0.73	61.7556630100	15.3349441485	22.1800	124.789	-19.967	10.0404	10.7174	9.2965
HD 286123	HD 286123	3406687485600728192	0	G0	5820.50	1.19	73.7667926594	18.6543229564	7.6214	62.064	-48.245	9.7263	10.0527	9.2693	K2-232
HD 28678	HD 28678	3282351760091020672	0	G8IV	4947.62	1.53	67.8560642714	4.5752495148	5.2379	1.214	-10.471	8.0547	8.6383	7.3584
HD 29021	HD 29021	471536354830504448	0	G5	5602.67	0.85	69.4681379310	60.6762985115	32.2355	62.433	23.014	7.5857	7.9608	7.0873
HD 290327	HD 290327	3214129537488896896	0	G0	5545.75	0.90	80.8399887156	-2.2780390955	17.6913	32.312	-97.224	8.8036	9.1849	8.2943
HD 2952	HD 2952	418206501834841600	0	K0III	4811.29	2.50	8.2938367034	54.8948177116	9.0540	70.293	-38.883	5.6275	6.1796	4.9965
HD 30177	HD 30177	4774301387290235136	0	G8V	5576.00	0.95	70.4770963677	-58.0208084832	17.9611	66.205	-11.990	8.2151	8.6126	7.7058
HD 30562	HD 30562	3188395880157173120	0	G2IV	5880.00	1.23	72.1529518806	-5.6751151904	38.1981	311.420	-249.057	5.5996	5.9458	5.1588
HD 30669	HD 30669	4880032624440826112	0	G9V	5386.00	0.92	72.1198522427	-28.4190756887	17.1874	237.622	50.932	8.9067	9.3209	8.3692
HD 30856	HD 30856	4893980371818915456	1	K0III	4993.40	1.35	72.5745099383	-24.3689281566	7.5932	18.392	-19.853	7.6581	8.1565	7.0382
HD 31253	HD 31253	3295354481521174656	0	F8	6024.67	1.23	73.6822877220	12.3520103201	17.1699	90.177	-42.749	6.9848	7.2952	6.5636
HD 31527	HD 31527	2972622770521857664	0	G0V	5922.00	0.96	73.9096193405	-23.2413163070	25.9807	-65.899	130.339	7.3322	7.6608	6.8879
HD 3167	HD 3167	2554032474712538880	0	K0V	5292.00	0.94	8.7401487433	4.3807215256	21.1175	107.409	-173.293	8.7622	9.1974	8.2069
HD 32518	HD 32518	497653157602636928	0	K1III	4817.30	1.13	77.4037568755	69.6391355013	8.1601	61.133	-62.406	6.1128	6.6849	5.4537
HD 32963	HD 32963	3421680597955802624	0	G5IV	5746.67	0.94	76.9820146029	26.3276805439	26.2328	-69.836	-66.019	7.4276	7.7841	6.9536
HD 330075	HD 330075	5982775854377691136	0	G5	4966.69	0.95	237.4054996998	-49.9639198581	22.0467	-232.760	-92.540	9.0916	9.5934	8.4702
HD 33142	HD 33142	2986948238799721216	0	K0III	5039.34	1.62	76.8980558940	-13.9863374113	8.2103	-7.511	33.648	7.7127	8.2060	7.1101
HD 332231	HD 332231	2056007995732413312	0	F8	6042.50	1.13	306.7411340383	33.7443882198	12.3678	-36.869	-14.651	8.4184	8.7146	8.0005
HD 33283	HD 33283	2955981936912654592	1	G4V	5963.75	1.24	77.0044888577	-26.7976688863	11.0993	56.184	-46.058	7.8993	8.2301	7.4550
HD 33564	HD 33564	553480551264062848	0	F7V	6396.33	1.25	80.6378979494	79.2318487516	47.6977	-78.386	162.118	4.9279	5.2239	4.6232
HD 33844	HD 33844	2986593268342544768	0	K0III	4888.10	1.78	78.1505649052	-14.9509775425	9.4249	32.832	31.057	7.0115	7.5440	6.3812
HD 34445	HD 34445	3241295308714904960	0	G0	5818.00	1.07	79.4207482939	7.3527156443	21.6675	-0.811	-146.997	7.1495	7.5006	6.6841
HD 35759	HD 35759	287622247440034688	0	G0	5927.67	1.15	82.8886636162	64.3183752618	14.0078	-29.159	-92.846	7.5961	7.9168	7.1599
HD 3651	HD 3651	2802397960855105920	0	K0.5V	5280.00	0.79	9.8387217516	21.2488844392	89.7891	-462.056	-369.814	5.6350	6.0977	5.0753
HD 37124	HD 37124	3402798414192387328	0	G4IV/V	5676.75	0.83	84.2599946801	20.7289783680	31.5536	-79.607	-420.161	7.4724	7.8440	6.9801
HD 37605	HD 37605	3332911492327546368	0	K0	5304.00	1.00	85.0074275513	6.0595116282	21.3450	52.466	-247.255	8.4619	8.8962	7.9186
HD 38283	HD 38283	4650314511916109696	0	F9.5V	6051.00	1.08	84.2605323760	-73.6998130817	26.2443	138.785	-108.526	6.5439	6.8670	6.1177
HD 38529 A	HD 38529	3219847066672970368	1	G8III/IV	5586.00	1.48	86.6451363075	1.1675865937	23.5819	-77.670	-141.987	5.7332	6.1421	5.2301	HD 38529
HD 38801	HD 38801	3012677738601895168	0	G8IV	5251.00	1.36	86.9963141207	-8.3280255609	10.9080	-57.742	-75.650	8.0340	8.4891	7.4634
HD 38858	HD 38858	3023711269067191296	0	G2V	5717.00	0.50	87.1458495682	-4.0956322429	65.5534	61.537	-229.454	5.7923	6.1553	5.3231
HD 39091	HD 39091	4623036865373793408	0	G0V	5960.50	1.09	84.2992797950	-80.4646040516	54.7052	311.187	1048.845	5.4907	5.8385	5.0643	pi Men
HD 39194	HD 39194	4657193606465368704	0	K0V	5305.67	0.88	86.1290710186	-70.1382377141	37.8311	-309.424	1238.780	7.8520	8.2816	7.3085
HD 39392	HD 39392	3424193536079703808	0	F8	6011.00	1.08	88.3288015536	22.0718207359	9.7326	-74.385	-76.957	8.2483	8.5613	7.8208
HD 39855	HD 39855	2966316109264052096	1	G8V	5575.50	0.87	88.6260730561	-19.7044472142	42.9636	92.854	-24.466	7.3211	7.7080	6.8143
HD 40307	HD 40307	4758877919212831104	0	K2.5V	4893.00	0.77	88.5172190722	-60.0237289163	77.2727	-52.423	-60.151	6.8437	7.3829	6.2112
HD 40956	HD 40956	1008018211509401728	0	K0	4919.92	2.00	91.6628014816	63.4538749528	8.5480	-35.510	8.623	6.1343	6.6726	5.4980
HD 40979 A	HD 40979	961428192989499904	1	F8	6076.67	1.10	91.1253345971	44.2597854703	29.3067	95.210	-152.903	6.5996	6.9095	6.1934	HD 40979
HD 41004 A	HD 41004 A	4794830231453653888	1	K1IV	5042.00	0.70	89.9565955798	-48.2394114381	24.0437	-41.520	59.652	8.3763	8.8626	7.7707
HD 41004 B	HD 41004 B	4794830231453653888	1	M2V		0.40	89.9583333000	-48.2397222000	24.0437	-41.520	59.652
HD 4113	HD 4113	5000774703569900800	1	G5V	5675.50	1.05	10.8027515028	-37.9831247622	23.8531	49.344	-114.176	7.7105	8.0837	7.2181	HD 4113 A
HD 42012	HD 42012	3452333199728743936	0	K0	5342.50	0.83	92.4854729801	34.1341721773	27.1464	36.429	-261.326	8.2295	8.6417	7.6902
HD 4203	HD 4203	2801366000472903040	0	G5	5502.00	1.13	11.1722287748	20.4483925039	12.2595	122.070	-124.192	8.5154	8.9031	8.0025
HD 4208	HD 4208	2343647384368388608	0	G7V	5644.00	0.87	11.1125531610	-26.5150391545	29.2163	313.484	149.500	7.6107	7.9767	7.1249
HD 42618	HD 42618	3319126988068404096	0	G4V	5830.00	1.01	93.0032172628	6.7819742146	41.0627	197.304	-254.848	6.6830	7.0422	6.2229
HD 4308	HD 4308	4708607629114652032	0	G6V	5752.75	0.85	11.1652594004	-65.6527159198	45.3930	157.504	-741.599	6.3721	6.7359	5.8926
HD 4313	HD 4313	2557541493057378048	0	G5	4966.50	1.72	11.4181301464	7.8450492172	7.3090	-6.074	6.769	7.5740	8.0774	6.9561
HD 43197	HD 43197	2896745747966986240	0	G9IV/V	5476.75	0.96	93.3993230705	-29.8971928924	15.9938	147.585	16.605	8.7716	9.1858	8.2421
HD 43691	HD 43691	959971546241168384	1	G0IV	6118.33	1.38	94.8946124072	41.0920772993	11.6535	22.727	-53.358	7.8972	8.2030	7.4792	HD 43691 A
HD 44219	HD 44219	3001428566419966592	0	G3V	5762.75	1.00	95.0599970760	-10.7250799411	18.8732	72.349	-16.568	7.5297	7.8866	7.0567
HD 45184	HD 45184	2898239468873596800	0	G2Va	5862.00	1.03	96.1820204740	-28.7806401566	45.5224	-165.257	-121.826	6.2051	6.5469	5.7491
HD 45350	HD 45350	955758320761687680	0	G5	5593.67	1.02	97.1902261678	38.9627314968	21.3056	-42.774	-53.514	7.7000	8.0918	7.1982
HD 45364	HD 45364	2893174259322992256	0	G8V	5466.00	0.82	96.4105735530	-31.4810037008	29.0797	52.182	-11.926	7.8802	8.2781	7.3621
HD 45652	HD 45652	3327980255695313792	0	K5	5321.50	0.83	97.3058709170	10.9336211668	28.6622	206.328	-62.573	7.9118	8.3486	7.3613
HD 46375 A	HD 46375 A	3131777319158581376	1	K1IV	5313.25	0.91	98.3030763012	5.4625071042	33.8088	111.477	-96.918	7.6953	8.1522	7.1346	HD 46375
HD 47186	HD 47186	2919760965879179136	0	G6V	5685.00	0.99	99.0367212271	-27.6234284878	26.6680	21.586	-262.948	7.4490	7.8271	6.9574
HD 4732	HD 4732	2345744256120965504	1	K0III	5016.00	1.74	12.3085088504	-24.1369079412	18.2248	80.969	-56.494	5.6333	6.1442	5.0373	HD 4732 A
HD 47366	HD 47366	2951804033248308480	0	K1III	4860.72	1.81	99.4200181241	-12.9856593003	11.8263	9.834	-125.718	5.8263	6.3547	5.2102
HD 4747	HD 4747	2348830516542120192	0	G8	5390.00	0.82	12.3639335107	-23.2119294890	53.1836	518.372	123.849	6.9421	7.3625	6.4044
HD 47536	HD 47536	5583831735369515008	0	K1III	4383.53	0.99	99.4489579615	-32.3394531053	8.1335	107.609	64.667	4.8324	5.5289	4.1431
HD 48265	HD 48265	5551551998119947648	0	G5IV/V	5695.00	0.93	100.0073683238	-48.5418283666	11.0155	26.426	29.736	7.8792	8.2600	7.3922
HD 49674	HD 49674	951427000863064192	0	G0	5610.00	1.07	102.8773483290	40.8672284023	23.2054	34.587	-122.797	7.9184	8.3052	7.4247
HD 50499	HD 50499	5579783574073770112	0	G0/2V	6016.75	1.28	103.0080749837	-33.9152669518	21.5765	-69.326	68.089	7.0564	7.3857	6.6257
HD 50554	HD 50554	3380479015342121600	0	F8V	6052.00	1.04	103.6782730438	24.2451409261	32.0570	-35.915	-96.881	6.6979	7.0098	6.2746
HD 51608	HD 51608	5485320853638354304	0	K0IV-V	5358.33	0.80	103.7137102069	-55.2600188576	28.4974	-27.951	-160.436	7.9606	8.3791	7.4251
HD 52265	HD 52265	3101382419728401408	0	G0V	6123.00	1.20	105.0746449034	-5.3668142364	33.3264	-116.524	80.467	6.1465	6.4584	5.7330
HD 5319	HD 5319	2537319343919089024	0	K0III	4921.43	1.51	13.7558096012	0.7893424917	8.2083	-5.398	-49.564	7.7724	8.2935	7.1418
HD 5388	HD 5388	4981024829037160320	0	F6V	6240.50	1.21	13.7990300307	-47.4067326068	18.8155	-80.390	-178.132	6.5915	6.8741	6.2017
HD 55696	HD 55696	5565208310497615232	0	G0V	6064.50	1.29	108.0622029166	-38.1746389787	12.7967	-31.517	-22.976	7.8114	8.1292	7.3851
HD 5608	HD 5608	362706006713454208	0	K0III	4893.00	1.55	14.5594348579	33.9505774187	17.1801	36.419	-71.265	5.7116	6.2479	5.1018
HD 564	HD 564	4973621989046219008	0	G2/3V	5950.00	0.96	2.4694459228	-50.2678998011	19.5154	-95.915	-17.387	8.1708	8.4917	7.7246
HD 59686	HD 59686	3169225963647395712	2	K2III	4650.57	1.90	112.9518628524	17.0857195175	11.1741	39.712	-76.077	5.0956	5.7128	4.4567	HD 59686 A
HD 60532	HD 60532	5619121248264726272	0	F6IV-V	6170.00	1.44	113.5130656273	-22.2958661049	38.4773	-39.836	46.477	4.2339	4.5860	3.8948
HD 62509	* bet Gem		0	K0IIIb		1.47	116.3250000000	28.0261111111	96.5400	-626.550	-45.800				beta Gem
HD 63454	HD 63454	5209903017765189760	0	K3V	4784.43	0.80	114.8406393133	-78.2791463561	26.5037	-19.710	-39.934	9.0540	9.6112	8.3975
HD 63765	HD 63765	5488567574038257280	0	G9V	5492.33	0.86	116.9582617145	-54.2653449614	30.7048	148.414	-278.869	7.9098	8.3142	7.3934
HD 64114	HD 64114	3037245604373149824	0	G7V	5676.00	0.95	117.9825560154	-11.0337221037	31.6907	-69.453	-173.481	7.5258	7.9041	7.0301
HD 6434	HD 6434	4988158666635743616	0	G2/3V	5768.00	0.89	16.1663441179	-39.4904909094	23.5794	-170.124	-527.851	7.5609	7.8920	7.1032
HD 65216	HD 65216	5287961677550103424	1	G5V	5658.00	0.92	118.4209646223	-63.6466892400	28.4445	-123.633	146.578	7.7943	8.1638	7.3053	HD 65216 A
HD 66141	HD 66141	3087964941887693056	0	K2III	4301.75	1.10	120.5662824966	2.3350264941	14.6704	-26.515	105.333	3.8905	4.6606	3.2338
HD 66428	HD 66428	3083043390405346432	0	G5	5689.00	1.06	120.8691653701	-1.1636018736	18.7398	-65.726	-206.937	8.0814	8.4514	7.5900
HD 67087	HD 67087	877846136542812160	0	F8V	6318.50	1.36	121.9155671930	31.5511553439	13.0396	-16.505	-37.693	7.9224	8.1959	7.5434
HD 6718	HD 6718	2475153682334693120	0	G5V	5730.00	0.96	16.9536004931	-8.2336164911	19.4476	192.637	20.080	8.2815	8.6336	7.8056
HD 68402	HD 68402	5214002100193281920	0	G5IV/V	5850.50	1.12	121.3474609266	-74.4100731613	12.7213	-78.186	78.934	8.9544	9.3004	8.4898
HD 68988	HD 68988	1090159839002347136	0	G0	5838.67	1.20	124.5935428553	61.4608518178	16.4066	128.329	30.270	8.0461	8.3864	7.5873
HD 69830	HD 69830	5726982995343100928	0	G8V	5499.75	0.86	124.6010091490	-12.6364246235	79.5945	278.787	-988.286	5.7393	6.1564	5.2179
HD 70573	HD 70573	3090083696499829376	0	G1/2V	5837.00	1.00	125.7079152854	1.8591088500	16.8683	-51.434	-49.185	8.5426	8.8810	8.0790
HD 70642	HD 70642	5540006949934104448	0	G6V	5667.33	1.00	125.3661078992	-39.7044431611	34.1287	-201.989	224.817	6.9921	7.3698	6.5138
HD 7199	HD 7199	4704957491028733824	0	K1IV	5263.00	0.89	17.6979343605	-66.1886947214	27.6312	110.513	-123.283	7.8374	8.2707	7.2928
HD 72490	HD 72490	603329694046441472	0	G5	5003.60	1.21	128.4028286656	13.5507189038	7.8872	25.239	-16.290	7.5741	8.0661	6.9686
HD 72659	HD 72659	3073443760538892032	0	G2V	5898.00	1.07	128.5128072324	-1.5686323106	19.2410	-112.548	-96.579	7.3107	7.6409	6.8647
HD 72892	HD 72892	5722585739105853184	0	G5V	5690.00	1.02	128.7195553675	-14.4574311031	14.3120	92.236	-170.404	8.6469	9.0101	8.1597
HD 73256	HD 73256	5643762781311698048	0	G8IV/V	5554.50	1.05	129.0949961243	-30.0373339234	27.2131	-182.015	67.080	7.8568	8.2694	7.3335
HD 73267	HD 73267	5638825939745228544	0	K0V	5333.25	0.89	129.0735123391	-34.4594468811	19.8087	-106.233	123.257	8.6784	9.1006	8.1345
HD 73526	HD 73526	5528196343922685056	0	G6V	5573.33	1.08	129.3183309823	-41.3184230860	10.2551	-61.097	158.982	8.7968	9.1800	8.2896
HD 73534	HD 73534	603083781399095936	0	G5	4938.00	1.17	129.8153421293	12.9599702719	11.9716	-114.056	-93.903	7.9571	8.4756	7.3259
HD 74156	HD 74156	582221750852254080	0	G1V	6050.00	1.24	130.6047813151	4.5772338459	17.3315	24.474	-200.293	7.4693	7.7856	7.0415
HD 7449	HD 7449	2482820714353923072	1	F9.5V	6031.00	1.05	18.6214649912	-5.0479715640	25.8363	-164.483	-134.376	7.3500	7.6638	6.9240	HD 7449 A
HD 75289 A	HD 75289	5524982093479504384	1	F9V	6107.00	1.05	131.9181715113	-41.7377748395	34.3167	-20.509	-227.945	6.2052	6.5185	5.7932	HD 75289
HD 75784	HD 75784	608182831000585728	0	G5	4974.57	1.41	133.0992289193	13.2330547877	11.6770	-119.403	-88.592	7.5599	8.0866	6.9228
HD 75898	HD 75898	713135102814342656	0	G0	6005.85	1.28	133.4611998971	33.0566884984	12.7836	-95.126	-28.672	7.8960	8.2162	7.4550
HD 76700	HD 76700	5272187804562841216	0	G6V	5639.50	1.00	133.4782248349	-66.8004746531	16.3960	-282.828	120.362	7.9735	8.3597	7.4743
HD 76920	HD 76920	5224124307320401024	0	K1III	4749.10	1.17	133.8203529599	-67.2653620530	5.4052	25.284	25.567	7.5144	8.1017	6.8350
HD 77065	HD 77065	685029558383335168	0	K2	4982.25	0.75	135.1989351619	21.4522353298	30.5124	270.165	-343.010	8.5150	8.9854	7.9213
HD 77338	HD 77338	5649661592466640000	0	K0IV	5353.98	0.93	135.3022475252	-25.5282342681	21.7410	39.870	-271.616	8.4099	8.8398	7.8596
HD 79211	HD 79211	1022456104850892928	1	M0V	3995.02	0.64	138.5916721988	52.6835210650	157.8851	-1573.121	-660.121	7.0477	7.9779	6.1250
HD 7924	HD 7924	560130775546153344	0	K0.5V	5243.50	0.83	20.4956562214	76.7101475254	58.8216	-34.643	-32.660	6.9252	7.3868	6.3554
HD 79498	HD 79498	686996756484129664	1	G5	5726.00	1.06	138.7885794396	23.3748791702	20.4010	-127.312	-155.619	7.8859	8.2470	7.4162
HD 80606	HD 80606	1019003226022657920	1	G5	5497.33	0.98	140.6569500559	50.6037764430	15.0153	55.933	10.340	8.8201	9.2148	8.3030
HD 80653	HD 80653	606477252238780160	0	G2	5838.00	1.18	140.3390844793	14.3678691391	9.0743	-33.463	-14.008	9.3073	9.6430	8.8509
HD 81040	HD 81040	637329067477530368	0	G0V	5798.67	0.96	140.9455026796	20.3646078026	29.0122	-151.258	36.125	7.5554	7.9081	7.0887
HD 81688	HD 81688	818464227945910016	0	K0III	4919.00	2.10	142.1665753410	45.6009240938	11.6388	-7.297	-129.582	5.0890	5.6464	4.5108
HD 82886	HD 82886	797597520179672064	0	G0	5101.00	1.06	143.9383526345	34.7805901695	7.8422	16.359	-35.369	7.3810	7.8579	6.7883
HD 82943	HD 82943	5691782130578684544	0	F9V	5984.00	1.13	143.7114034489	-12.1302976194	36.2158	1.513	-174.718	6.3860	6.7171	5.9471
HD 8326	HD 8326	5036553052456200320	1	K2V	4914.00	0.80	20.5314418305	-26.8940677585	32.5591	-58.470	-224.887	8.4749	9.0022	7.8351
HD 83443	HD 83443	5424836719001215360	0	K0/1V	5487.00	0.90	144.2994102916	-43.2727209600	24.4215	21.742	-120.183	8.0265	8.4428	7.4978
HD 8535	HD 8535	4984244302162168704	1	G0V	5955.33	1.13	20.9054803999	-41.2701007017	18.0086	57.642	-69.838	7.5607	7.8614	7.1454
HD 85390	HD 85390	5406324138654973824	0	K1.5V	5152.50	0.76	147.5105662771	-49.7905253960	29.8018	24.357	-60.245	8.2946	8.7529	7.7186
HD 85512	HD 85512	5412947081287925504	0	K6V	4420.59	0.69	147.7821225633	-43.5048161715	88.6158	461.446	-472.010	7.1873	7.8825	6.4186
HD 8574	HD 8574	297045096447719040	0	F8	6053.00	1.17	21.3033807289	28.5660169088	22.2795	251.399	-157.461	6.9835	7.2957	6.5641
HD 86081	HD 86081	3823126385045210880	1	G1V	5973.00	1.21	149.0243714195	-3.8083542600	9.5928	-67.001	15.999	8.5880	8.9167	8.1496	HD 86081 A
HD 86226	HD 86226	5660492297395345408	0	G2V	5924.50	1.06	149.1235153561	-24.0991859352	21.8612	-177.111	46.867	7.7713	8.1083	7.3333
HD 86264	HD 86264	5685917541714610688	1	F7V	6324.75	1.42	149.2409308359	-15.8953993234	14.7184	-14.158	-65.457	7.2837	7.5584	6.9030
HD 8673	HD 8673	317350357498173312	1	F7V	6433.00	1.31	21.5378455270	34.5793389398	26.3828	236.277	-84.481	6.2191	6.4868	5.8690	HD 8673 A
HD 87646	HD 87646	623313901995781632	1	G1IV	5863.00	1.12	151.6695434993	17.8949794804	7.3980	-82.884	-27.078	7.9295	8.2526	7.4441	HD 87646 A
HD 87883	HD 87883	747266452000257280	0	K0V	4964.74	0.82	152.1794175227	34.2419983873	54.6421	-64.565	-61.581	7.2719	7.7921	6.6522
HD 88133	HD 88133	623408253837371392	0	G5	5413.67	1.20	152.5319348754	18.1857283854	13.5561	-11.076	-265.160	7.8098	8.2313	7.2728
HD 89307	HD 89307	3886688327612984704	0	G0V	5977.75	1.03	154.5874957631	12.6209391709	31.2110	-272.380	-39.416	6.8682	7.1938	6.4453
HD 89345	HD 89345	3877070590167177344	0	G5	5600.50	1.16	154.6710977391	10.1288463946	7.5275	5.348	-42.449	9.2170	9.6065	8.7079
HD 89744 A	HD 89744	804739952015901056	1	F7V	6238.75	1.40	155.5433193447	41.2289354231	25.8537	-120.573	-138.144	5.5865	5.8904	5.1985	HD 89744
HD 90156	HD 90156	5461620846141553024	0	G5V	5705.00	0.84	155.9801144179	-29.6451030383	45.5299	-39.090	99.076	6.7395	7.1116	6.2578
HD 9174	HD 9174	5044029491007060608	0	G8IV	5556.00	1.03	22.5043351893	-19.6052944700	12.2429	34.762	-184.070	8.2292	8.6168	7.7184
HD 92788	HD 92788	3802549437248150656	0	G6V	5722.00	1.13	160.7021350930	-2.1847172657	28.8281	-15.128	-223.230	7.1393	7.5118	6.6604
HD 92987	HD 92987	5394489064197253376	0	G2/3V	5807.67	1.08	160.9012407431	-39.0583856752	22.9417	15.444	23.218	6.8599	7.2072	6.4008
HD 93083	HD 93083	5450573881018549760	0	K2IV-V	4997.08	0.70	161.0866671946	-33.5776794291	35.0393	-92.721	-152.238	8.0421	8.5447	7.4315
HD 93148	HD 93148	1076970406751899008	1	F5	6403.88	1.46	161.9090272510	71.6557270031	10.3320	-56.184	-34.808	8.2375	8.4840	7.8791	KELT-24
HD 93385 A	HD 93385	5391813299572883456	1	G2/3V	5977.00	1.10	161.5627064932	-41.4646039969	23.0405	-48.197	-54.727	7.3377	7.6615	6.8984
HD 9446	HD 9446	302956655074266112	0	G5V	5791.00	1.00	23.3350423946	29.2649187299	19.8336	190.249	-53.650	8.2095	8.5626	7.7370
HD 94834	HD 94834	3995918691799173248	0	K1IV	4874.78	1.11	164.3126362660	24.1429373926	10.1591	-72.056	36.095	7.3024	7.8412	6.6633
HD 95086	HD 95086	5231963962676292224	0	A8III	7520.79	1.70	164.2621031901	-68.6672916740	11.5684	-41.136	12.700	7.3092	7.4459	7.1210
HD 95089	HD 95089	3808410933735817472	0	G9IV	5017.20	1.38	164.6987480356	1.7290086967	7.2750	-35.732	-47.877	7.6606	8.1732	7.0389
HD 95338	HD 95338	5340648488081462528	0	K1IV-V	5175.00	0.76	164.8563364171	-56.6235563683	27.0025	-416.880	-119.710	8.3821	8.8464	7.8017
HD 9578	HD 9578	5008967783184322048	0	G1V	5963.00	1.12	23.3212637474	-38.2451805991	17.7921	-31.415	-38.109	8.0541	8.3690	7.6199
HD 95872	HD 95872	3537576785745979904	0	K0V	5180.93	0.95	165.8658796321	-22.0943302653	13.8178	-250.469	-80.257	9.6528	10.1062	9.0777
HD 96063	HD 96063	3791263156547622784	0	G6V	5113.32	1.02	166.1853484445	-2.5132965734	7.1116	27.950	-18.198	7.9699	8.4419	7.3769
HD 96167	HD 96167	3758718711877270784	1	G3V	5765.75	1.31	166.3125656517	-10.2913449670	11.6947	-50.494	-9.496	7.9285	8.2931	7.4495
HD 96700	HD 96700	5452492082132835840	0	G1V	5887.00	1.10	166.9742616365	-30.1751383294	39.3239	-505.444	-132.436	6.3516	6.6906	5.8998
HD 97658	HD 97658	3997075206232885888	0	K1V	5192.33	0.77	168.6376583690	25.7105961590	46.3494	-107.534	48.662	7.5136	7.9695	6.9479
HD 98219	HD 98219	3534621989981179520	0	K0III/IV	4946.00	1.30	169.4475218354	-23.9754880363	8.7662	-130.770	-16.887	7.7908	8.2941	7.1754
HD 984	HD 984	2431157720981843200	0	F7V	6234.33	1.20	3.5431748092	-7.1994074562	21.7806	104.539	-67.911	7.1908	7.4744	6.7994
HD 98649	HD 98649	3538141457982396928	0	G4V	5720.67	1.00	170.2147665294	-23.2181063344	23.6832	-199.885	-177.918	7.8289	8.1857	7.3488
HD 98736	HD 98736	3977050728669174912	1	K0	5312.00	0.92	170.4549045142	18.1896082092	30.7918	-151.997	-92.481	7.7545	8.2045	7.2056
HD 99109	HD 99109	3796826582305099520	0	G9IV	5226.00	0.93	171.0715576031	-1.5297610187	18.2228	-178.777	-159.754	8.8682	9.3163	8.3042
HD 99706	HD 99706	784227772318969472	0	K0	4974.25	1.72	172.1261620830	43.9662025433	6.7929	45.406	-87.500	7.3775	7.8973	6.7497
HD 108236	HD 108236	6125644402384918784	0	G5V	5603.45	0.85	186.5740626711	-51.3630519484	15.4517	-70.434	-49.865	9.0875	9.4355	8.6056
HIP 105854	HIP 105854	6583094222249556224	0	K2III	4643.50	2.10	321.5962275049	-37.8294781686	12.6896	168.273	-10.805	5.2557	5.9060	4.5959
HIP 107773	HIP 107773	6402076022332085760	1	K0III	4900.00	2.42	327.5005088803	-64.7126993455	9.4796	-0.703	-37.443	5.3331	5.8761	4.7299
HIP 109384	HIP 109384	2230429435107258752	0	G5	5270.00	0.78	332.4089719849	71.3139559750	16.9323	233.675	-87.308	9.3880	9.8229	8.8275
HIP 109600	HIP 109600	1894962115280642688	1	G5	5595.25	0.87	333.0270789811	29.0662082046	15.0460	208.654	92.186	9.0039	9.3859	8.4958
HIP 116454	HIP 116454	2645940376800212096	1	K0	5068.68	0.78	353.9543516674	0.4447043129	15.9843	-232.909	-187.564	9.9321	10.4132	9.3265
HIP 11915	HIP 11915	5130377231512290816	0	G5V	5768.75	1.00	38.4552845212	-19.6116532386	18.5218	220.590	35.400	8.4491	8.7976	7.9784
HIP 12961	HIP 12961	5077642283022422656	0	K5V	4044.56	0.67	41.6800748992	-23.0860048425	42.7591	294.923	140.972	9.5989	10.4930	8.7005
HIP 14810	HIP 14810	60684353135617792	0	G5	5554.00	0.99	47.8092750465	21.0971302236	19.7810	-3.784	-53.154	8.3331	8.7235	7.8244
HIP 35173	HIP 35173	3059948148669499008	0	K2V	4881.20	0.79	109.0449329008	-3.6661272573	30.1315	105.084	-50.690	8.7083	9.2542	8.0563
HIP 36985	HIP 36985	3060788514846284032	0	M1.0V	4223.34	0.62	114.0297935917	-3.1120239459	71.0791	68.236	-289.990	9.1183	10.1609	8.1217
HIP 38939 A	HIP 38939	5698188160215537920	0	K4V	4693.10	0.71	119.5199402513	-25.6276869779	54.1012	362.263	-245.891	8.0635	8.6576	7.3691
HIP 41378	HIP 41378	600698184764497664	0	F8	6169.00	1.17	126.6158279481	10.0803708126	9.3799	-48.143	0.059	8.8100	9.0775	8.4225
HIP 5158	HIP 5158	2351405057377686272	0	K5V	4723.48	0.78	16.5094891153	-22.4536134170	19.3500	203.899	-106.761	9.8023	10.3878	9.1126
HIP 54373	HIP 54373	3552000252294347392	0	K5V	4021.44	0.57	166.8643532401	-19.2916856804	53.3991	-235.019	-45.987	9.6408	10.6264	8.6893
HIP 57050	HIP 57050	772430527947893632	0	M4.0Ve	3698.49	0.34	175.4326080723	42.7515862241	90.7623	-575.654	-89.974	10.5769	12.1617	9.3771	GJ 1148
HIP 57274	HIP 57274	4021079911593673600	0	K4V	4646.25	0.73	176.1705487465	30.9576484378	38.6381	-27.069	-381.708	8.5707	9.1975	7.8555
HIP 63242	HIP 63242	5858576597131420288	0	G8III	4799.94	1.54	194.3824825403	-65.6463263291	6.3628	-65.486	31.269	6.5645	7.1244	5.9116
HIP 64892	HIP 64892	6088264477373916032	0	B9.5V	8922.00	2.35	199.5210838039	-44.0554697801	7.9875	-30.666	-20.272	6.7843	6.7930	6.8212
HIP 65407	HIP 65407	1553084230347385344	0	K0	5314.25	0.93	201.0876630001	48.8847322416	16.1574	0.101	-85.576	9.1510	9.5727	8.6048
HIP 65426	HIP 65426	6070080754075553792	0	A2V	8735.00	1.96	201.1501726982	-51.5045383581	9.1566	-34.246	-18.811	6.9827	7.0409	6.9239
HIP 65891	HIP 65891	5870273893372957440	0	K0III	4909.25	2.50	202.6050857158	-58.6643937454	6.6249	-25.939	-8.941	6.4789	7.0054	5.8523
HIP 65A	HIP 65	4923860051276772608	1	K4V	4658.67	0.78	0.1856062908	-54.8308228455	16.1560	-202.815	-71.518	10.5895	11.2349	9.8486
HIP 67522	HIP 67522	6113920619134019456	0	G0V	5756.00	1.22	207.5260009746	-40.8358960675	7.8288	-28.843	-22.425	9.6326	9.9859	9.1359
HIP 67537	HIP 67537	6114034246789494528	0	K1III	5048.19	2.41	207.5808445056	-39.9008995834	8.5888	4.960	-9.768	6.1650	6.6828	5.5512
HIP 67851	HIP 67851	6169943210465504384	0	K0III	4791.33	1.30	208.4653640085	-35.3146535985	15.5674	-295.042	-69.160	5.8823	6.4344	5.2442
HIP 68468	HIP 68468	6170740906151056896	1	G3V	5579.00	1.05	210.2644075372	-32.7574682219	10.0106	-122.838	-120.353	9.2213	9.5693	8.7425
HIP 70849	HIP 70849	6099000589942631424	0	K7Vk	4097.64	0.63	217.3270761957	-46.4646839781	41.5387	-43.981	-201.760	9.6980	10.6150	8.7861
HIP 71135	HIP 71135	5897706154359881088	0	M1	4146.27	0.66	218.2158073346	-52.6464757497	30.9011	-250.339	-48.762	9.9583	10.7670	9.1073
HIP 73990	HIP 73990	6212050520082538880	1	F2IV	7148.87	1.72	226.8121000462	-29.5046071479	9.0326	-27.432	-29.028	8.0678	8.2523	7.7933
HIP 74865	HIP 74865	6211094559143445888	0	F3V	6462.70	1.42	229.4836899233	-30.4782950391	8.0951	-21.070	-28.425	8.7959	9.0339	8.4469
HIP 74890	HIP 74890	6004107513791584512	0	K1III	4850.00	1.74	229.5714973738	-41.4210960813	12.6848	-123.921	-121.805	6.7523	7.3075	6.1018
HIP 77900	HIP 77900	6233740654686482560	0	B7V	8383.25	2.74	238.6253900739	-27.3387433866	6.6037	-13.357	-25.272	6.1129	6.1001	6.1820
HIP 78530	HIP 78530	6243537406369453824	0	B9V	8350.00	2.50	240.4810051791	-21.9804920312	7.2848	-12.013	-24.112	7.1467	7.2120	7.0628
HIP 79431	HIP 79431	6245870673116518784	0	M3V	3715.08	0.49	243.1742467309	-18.8764247174	68.7833	35.707	-214.050	10.2351	11.6327	9.1106
HIP 8541	HIP 8541	4912062772547406976	1	K2III/IV	4708.93	1.17	27.5271962430	-54.4651632505	6.4178	110.475	-46.670	7.5607	8.1494	6.8739
HIP 91258	HIP 91258	2159653734187847168	0	G5	5520.00	0.95	279.2211172539	61.7015065266	21.7649	-39.489	-231.747	8.4503	8.8674	7.9258
HIP 97233	HIP 97233	4238527753544691712	0	K0/1III	4955.15	1.93	296.4221206725	-0.6968793505	9.7489	33.152	-54.240	7.0702	7.5891	6.4509
HN Peg	HN Peg	1772187382746856320	0	G0V+	5955.00	1.00	326.1315705189	14.7714524361	55.1631	231.086	-113.134	5.8109	6.1395	5.3722
HR 2562	HR 2562	5480006192386819456	0	F5V	6471.00	1.30	102.5042716177	-60.2486775442	29.3767	4.663	108.377	5.9887	6.2467	5.6461
HR 3549	HR 3549	5304593027881569024	0	A0V	9438.00	2.60	133.2655704417	-56.6493281951	10.4864	-22.321	35.882	6.0006	6.0110	6.0373
HR 5183	HR 5183	3721126409323324416	1	G0V	5912.00	1.07	206.7357992452	6.3498993635	31.7568	-510.447	-110.225	6.1689	6.5133	5.7163
HR 5460	* alf Cen B		1	K1V		0.88	219.9141249975	-60.8394805553	743.0000	-3614.390	802.980				alpha Cen B
HR 7329	* eta Tel	6643602576214115584	1	A0V	9564.25	2.40	290.7135498476	-54.4242866254	21.1147	25.616	-82.536	4.9982	5.0331	5.0318
HR 810	HR 810	4745373133284418816	0	F8V	6126.50	1.11	40.6417178084	-50.7993483991	57.7143	333.826	219.488	5.2242	5.5616	4.8402	iota Hor
HR 858	HR 858	5064574720469473792	1	F6V	6288.00	1.15	42.9849778714	-30.8140609337	31.2565	123.229	105.788	6.2480	6.5235	5.8657
HR 8799	HR 8799	2832463659640297472	0	A5V	7376.66	1.52	346.8701486328	21.1340375530	24.2175	108.301	-49.480	5.8985	6.0635	5.6691
iota Draconis	iota Draconis	1614731957530945280	0	K2III	4642.00	1.40	231.2323227265	58.9661402919	31.5727	-8.587	18.505	2.8471	3.8020	2.4284	iot Dra, iota Dra, HIP 75458
K2-105	K2-105	651907079835937280	0	G7	5302.60	0.99	125.4202985238	13.4975121811	5.0222	6.963	-4.878	11.7124	12.1284	11.1593
K2-110	K2-110	3613175223837135616	0	K2V	4914.35	0.75	207.3497402412	-12.2849182080	8.5568	45.127	-102.130	11.6627	12.1926	11.0025
K2-116	K2-116	2602406721431348096	0	K7V	4412.00	0.69	336.1523362666	-11.5793180903	20.2201	168.973	-145.762	10.3281	11.0386	9.5486
K2-121	K2-121	662078902422542336	0	K5V	4680.45	0.72	126.9366623846	17.5793266789	5.8746	-13.870	-14.712	12.9247	13.5523	12.1886
K2-124	K2-124	686230534318440960	0	M3V	3358.00	0.39	133.6410514899	23.1329508989	7.0953	-30.274	12.432	15.4618	16.7600	14.3295
K2-125	K2-125	3606324613561098368	0	M2V	3601.94	0.49	204.1418753903	-14.9478195313	8.0260	-53.032	-49.544	15.1508	16.3401	14.0658
K2-126	K2-126	3606785098479012864	0	K7V	4309.70	0.69	203.5467020565	-13.5769704516	9.6852	36.130	-8.208	12.4013	13.1525	11.5714
K2-128	K2-128	3618386664139093504	0	K4V	4730.77	0.71	204.4376665920	-8.5970858010	8.6952	1.412	-4.367	12.2204	12.8801	11.4601
K2-129	K2-129	6769308026926349056	0	M3V	3880.65	0.36	289.1485490924	-25.6463233237	35.9483	51.443	-312.061	12.4624	13.9036	11.2985
K2-130	K2-130	4083382672829717504	0	K5V	4476.79	0.70	290.2705418894	-19.6908744153	8.4451	61.006	-15.318	12.3253	13.0152	11.5460
K2-131	K2-131	3580920878437938688	0	G	5048.25	0.84	182.7514039914	-9.7652391599	6.5285	-39.485	-5.371	11.8999	12.3810	11.2789
K2-133	K2-133	148080473682357376	0	M1V	3761.00	0.46	70.1493775489	25.0098134927	13.2743	185.658	-46.363	13.3245	14.3108	12.3413	LP 358-499
K2-136	K2-136	145916050683920128	3	K5.5V	4334.00	0.74	67.4128614999	22.8825673757	16.8497	82.874	-35.617	10.8545	11.5649	10.0655	K2-136 A
K2-141	K2-141	2643952940813536768	0	K5/6	4623.05	0.71	350.9170463822	-1.1891827044	16.1332	116.168	25.358	10.7217	11.3719	9.9786
K2-146	K2-146	661192902209491456	0	M3.0V	3679.00	0.33	130.0266950537	19.0923416021	12.5821	-15.917	-129.020	14.9834	16.4311	13.7921	EPIC 211924657
K2-155	K2-155	145333927996558976	0	K6V	4247.55	0.65	65.4696140473	21.3532632795	13.7077	200.606	-76.763	12.2528	13.0534	11.3888	LP 415-17
K2-156	K2-156	3596250888028092160	0	K	4477.88	0.66	182.6996730263	-6.2943551757	6.6289	-122.825	-33.585	12.9484	13.6627	12.1473
K2-158	K2-158	3596003497911958528	0	G	5382.00	0.92	179.9397080980	-5.7216878544	5.0403	-62.516	6.557	11.6134	12.0214	11.0672
K2-159	K2-159	3600851450836925312	0	G	5338.75	0.90	180.5408895561	-3.5809053186	5.8197	-1.362	-26.508	11.6397	12.0575	11.0865
K2-162	K2-162	3694878833385971840	0	K	4798.16	0.75	186.0383865016	-1.1114790040	8.0078	-63.168	-30.235	11.9662	12.5330	11.2768
K2-165	K2-165	3700016198387202304	0	G	5183.40	0.83	184.9004880505	0.9683269596	7.4019	29.168	-14.590	11.3272	11.7931	10.7471
K2-167	K2-167	2594479109451475456	0	F7V	6073.50	1.02	336.5761233395	-18.0116650264	12.3328	73.606	-114.505	8.1036	8.4015	7.6885
K2-17	K2-17	3899064464855774592	0	K5V	4360.00	0.71	178.3296745795	6.4123178275	7.9646	-24.096	15.321	13.0023	13.7978	12.1485
K2-174	K2-174	46217666333148416	0	K7V	4430.37	0.70	60.7929728727	16.3471659566	9.9783	31.845	-62.191	12.0082	12.7159	11.2149
K2-179	K2-179	65797082206292224	0	G	5100.00	0.82	58.7967878188	23.7567523826	5.2128	-23.342	-10.770	12.6910	13.2475	12.0010
K2-18	K2-18	3910747531814692736	0	M4	3856.18	0.36	172.5601409806	7.5878315327	26.2686	-80.377	-133.142	12.4154	13.7330	11.2908
K2-182	K2-182	601480723509077632	0	G	5069.23	0.88	130.1800460209	10.9829509012	6.4304	-65.162	1.417	11.7202	12.1896	11.1222
K2-184	K2-184	651522834880015872	0	G	5109.93	0.86	129.1405226730	14.4618825810	13.2015	89.832	-12.416	10.1300	10.5708	9.5595
K2-190	K2-190	3607243530404017280	0	G	5494.00	0.90	205.3630485028	-13.1608686020	6.1951	-114.255	11.884	10.9586	11.3413	10.4401
K2-198	K2-198	3628687065162340224	0	G	5114.00	0.80	198.8436816732	-6.4649887571	9.0163	-36.688	-21.893	10.9955	11.4582	10.4115
K2-199	K2-199	3620501712193719296	0	K5V	4864.74	0.73	208.9014507619	-6.1360832641	9.2723	-59.256	15.198	11.9053	12.5253	11.1753
K2-200	K2-200	3635174042031610496	1	K1	4999.78	0.86	202.2512059927	-4.6100531634	5.4029	-88.578	39.149	12.2315	12.7012	11.6219
K2-201	K2-201	6771370981322320128	0	G	5134.00	0.96	293.5607116724	-23.1312774669	5.0239	-2.972	-40.892	11.9433	12.3871	11.3588
K2-203	K2-203	2535901287452166400	0	G	4956.93	0.79	12.7736908904	-1.1958844116	5.9906	-11.231	0.602	12.1219	12.6136	11.4932
K2-209	K2-209	2537467988442521600	0	K	4766.32	0.74	14.6903463808	1.3828070366	13.0435	-75.315	-230.284	10.7447	11.3163	10.0564
K2-210	K2-210	2538051863476537984	0	G	5382.52	0.91	17.6412693825	1.5784136702	5.6373	70.747	31.919	11.5845	12.0074	11.0282
K2-212	K2-212	2538824923230146560	0	K	4246.26	0.67	18.4241014826	3.0970732490	9.1281	162.635	31.577	12.5500	13.3341	11.7005
K2-216	K2-216	2556231154370582400	0	K	4703.27	0.70	11.4802353817	6.3470302411	8.6325	-1.970	10.605	12.0576	12.6868	11.3195
K2-222	K2-222	2584093844170270720	0	G0	5902.70	1.00	16.4625202711	11.7537171125	9.8413	55.296	67.120	9.3607	9.6678	8.9271
K2-223	K2-223	3578046995560843520	0	G	5727.00	1.06	185.3061830170	-10.2820914688	5.0074	7.378	-15.040	11.2736	11.6318	10.7740
K2-227	K2-227	3675261140764265728	0	G	5485.00	0.95	190.9484237157	-8.4784158694	5.3129	-17.302	-29.216	11.4954	11.8618	10.9862
K2-228	K2-228	3583611726987567232	1	K6	4927.60	0.71	187.2947046904	-6.8342027656	7.7079	-12.742	13.816	12.6527	13.2601	11.9170
K2-229	K2-229	3583630929786305280	0	G	5161.23	0.87	186.8729194514	-6.7218474467	9.7229	-80.886	7.434	10.7861	11.2429	10.2036
K2-233	K2-233	6253186686054822784	0	K3	4889.23	0.80	230.4799010632	-20.2317974622	14.7849	-19.871	-31.188	10.4191	10.9550	9.7603
K2-241	K2-241	3594882751966012160	0	G	5131.58	0.71	181.2386829152	-6.8052985437	6.6622	-102.720	-59.180	11.7562	12.2033	11.1668
K2-242	K2-242	3595647565382917120	0	M	4172.86	0.38	179.8358420651	-6.5178542476	9.1259	-6.938	-4.581	15.3818	16.7912	14.2079
K2-25	K2-25	3311804515502788352	0	M4.5V	3740.81	0.29	63.2739345689	15.2477026627	22.2153	122.148	-18.337	14.3817	16.0749	13.1200	EPIC 210490365
K2-251	K2-251	3675248118423392256	0	K	3556.50	0.52	190.6892402770	-8.5359825651	6.7729	10.958	-18.010	14.7702	15.8917	13.7186
K2-255	K2-255	3682825883842696832	0	K	4601.44	0.71	189.9128531529	-3.3705631243	5.1905	-29.558	-4.084	13.3087	13.9905	12.5255
K2-257	K2-257	3695235654973028736	0	K	4089.52	0.52	188.2782839600	-1.9532879401	15.5949	-47.153	-28.861	12.8602	13.9491	11.8355
K2-26	K2-26	3425691139632545152	0	M1.0V	3978.82	0.56	94.2064311840	24.5958335295	10.0674	-28.044	-115.639	13.7519	14.8422	12.7345
K2-263	K2-263	657756997089784960	0	G9V	5340.50	0.88	129.6821253348	15.6806038906	6.1262	-55.388	-4.851	11.4055	11.8239	10.8558
K2-265	K2-265	2597119620985658496	1	G8V	5390.00	0.92	342.0316493086	-14.4947789002	7.1829	30.196	-23.338	10.9277	11.3367	10.3636
K2-275	K2-275	661598415839633024	1	K3V	4847.00	0.79	132.1698795144	20.4550162331	8.0727	-4.872	-15.641	11.8139	12.3589	11.1456
K2-277	K2-277	3604866381969319040	0	G	5640.28	1.02	202.0161895287	-15.9379749413	8.8115	-98.674	-36.096	10.1214	10.4951	9.6239
K2-279	K2-279	3632489004572413952	0	G	5479.00	0.79	204.7792934623	-6.0417591666	5.4367	-87.029	-53.761	11.5907	11.9652	11.0688
K2-28	K2-28	2622296783699476864	0	M4V	3940.25	0.26	335.6233145115	-7.9563525240	15.8456	-254.655	-194.551	14.6799	16.3207	13.4326
K2-285	K2-285	2657374606238804992	0	K	4993.88	0.83	349.3843458143	1.3001522089	6.4248	15.023	-33.874	11.8040	12.2817	11.1943
K2-287	K2-287	6239702034929248512	0	G	4994.11	1.06	233.0743401326	-22.3583446896	6.2875	-4.594	-17.899	11.0670	11.5676	10.4401
K2-288B	K2-288B	44838019756570112	1	M3V		0.33	55.4442857091	18.2684913011	15.2166	185.476	-74.070	14.5451			K2-288 B
K2-29	K2-29	150054788545735424	1	G7V	4950.17	0.94	62.6704220191	24.4016558406	5.5745	16.452	-21.988	12.2008	12.7748	11.5029
K2-291	K2-291	3409148746676599168	0	G0	5416.17	0.93	76.4459400227	21.5481990140	11.0758	30.712	-97.082	9.8664	10.2550	9.3469
K2-292	K2-292	3616931735377523712	0	G3V	5638.77	1.00	205.3758785703	-9.9460703616	8.7212	-88.200	1.669	9.7560	10.1060	9.2742
K2-3	K2-3	3796690380302214272	0	M0.0V	4126.69	0.60	172.3353708063	-1.4551363802	22.6610	94.034	-78.139	11.4785	12.3962	10.5531
K2-32	K2-32	4130539180358512768	1	K1	5010.00	0.86	252.4260079692	-19.5430504074	6.3137	-16.597	-53.639	12.0036	12.5502	11.3201
K2-33	K2-33	6245758900889486720	0	M2e	3881.10	0.54	242.5613635285	-19.3193830517	7.1530	-9.709	-23.986	14.1570	15.7451	12.9281
K2-36	K2-36	3811989156889528320	1	K3	4808.20	0.79	169.4490101766	3.8665038163	9.0832	-20.521	26.194	11.5270	12.0737	10.8643
K2-43	K2-43	3789847707126025600	0	K7V	3678.00	0.57	169.1170280480	-3.9754405056	5.4503	-29.087	-1.886	14.8215	15.8853	13.7947
K2-53	K2-53	6244643373326639360	0	K2V	4749.35	0.85	244.1419684107	-20.4005983967	7.2173	33.489	-18.873	12.1478	12.7697	11.3952
K2-54	K2-54	2594546351459477760	1	K8	4066.72	0.62	338.0541631130	-17.5440635853	5.6871	-5.005	-9.706	13.9449	14.8098	13.0370
K2-55	K2-55	6825931948041984256	0	K7V	4422.00	0.70	333.7518785625	-17.2508001849	6.2400	-12.590	-22.096	13.0624	13.7933	12.2472
K2-58	K2-58	2599975224481836672	0	G	4977.49	0.89	333.8218394899	-14.0498569656	5.4737	4.798	-10.965	12.1319	12.6318	11.5051
K2-62	K2-62	2612830229101544704	0	K3V	4844.47	0.77	334.3645088639	-12.1874776303	8.8628	75.453	5.980	12.0433	12.6696	11.3090
K2-68	K2-68	2614734243939231232	0	K	4840.54	0.73	334.0195539291	-10.5673649140	5.9009	-52.525	-9.486	12.6573	13.2159	11.9760
K2-69	K2-69	2614926005638892032	0	K	4091.03	0.55	335.7596816181	-10.4886816953	5.5058	26.661	-28.645	15.0572	16.1698	14.0095
K2-71	K2-71	2608279114251674624	0	K	3926.73	0.48	341.7248656270	-9.8816109261	6.4995	103.555	0.590	15.1887	16.4550	14.0698
K2-72	K2-72	2615653023342995584	0	M2V	4103.93	0.27	334.6227504020	-9.6120083608	15.0242	195.855	74.339	14.2789	15.5520	13.1680
K2-77	K2-77	37619725922094336	0	K	4816.83	0.80	55.2285210047	12.5724479631	7.0270	22.558	-37.906	11.9202	12.4850	11.2359
K2-83	K2-83	40139531695379328	0	M1V	4143.19	0.48	59.9013782410	15.5587993968	7.9375	-40.430	-18.790	13.8042	14.7599	12.8443
K2-85	K2-85	49784688211974144	0	K5V	4349.88	0.57	59.4648289919	18.4649504965	10.2574	94.027	-68.662	12.0600	12.8090	11.2391
K2-88	K2-88	56983706234931328	0	M1V	3981.23	0.26	54.7514565793	19.1199667286	9.0166	-24.611	-47.998	14.5451	15.7294	13.4657
K2-89	K2-89	63206117414110848	0	M1V	4117.57	0.35	57.0671234492	20.4594884646	11.5940	90.227	-33.829	13.3216	14.4080	12.2927
K2-9	K2-9	3795633852707093120	0	M2.5V	3972.66	0.30	176.2637239608	0.0054085041	12.0250	-170.752	26.629	14.8665	16.1017	13.7691
K2-90	K2-90	65331198513957376	0	K5V	4110.89	0.63	59.1527390662	22.4724516676	7.4234	72.810	-45.381	13.2292	14.0568	12.3422
K2-91	K2-91	149858216482858112	0	M3V	3802.12	0.29	63.2182348455	24.2047217588	15.9515	43.005	-89.449	14.3219	15.8269	13.1225
Kappa And	Kappa And	1926476042677456768	0	A0V	9423.33	2.77	355.1025973870	44.3338511490	19.9751	80.932	-20.108	4.0529	4.1001	4.1889	kap And, kappa And
kappa CrB	kappa CrB	1372702716380418688	0	K1IVa	4835.25	1.51	237.8080011983	35.6558817660	33.2328	-8.792	-347.766	4.4602	5.0475	3.8895	kap CrB
Kapteyn	HD 33793	4810594479417465600	0	M1VIp	3979.37	0.28	77.9586612956	-45.0430198278	254.2263	6491.474	-5709.218	8.0620	9.1107	7.0770
KELT-10	KELT-10	6710517793025165696	0	G0V	5757.40	1.11	284.5483823423	-47.0033071741	5.2800	1.443	-15.580	10.7009	11.0400	10.2286
KELT-11	KELT-11	3761497761876022400	0	G9IV	5320.67	1.44	161.7069052724	-9.3993645770	10.0562	-79.091	-78.576	7.8311	8.2659	7.2822
KELT-20	KELT-20	2033123654092592384	0	A0	8894.75	2.00	294.6614126147	31.2192000731	7.3015	3.096	-6.157	7.5749	7.6251	7.5344
KELT-23 A	KELT-23 A	1644692064543192704	1	G2V	5787.00	0.94	232.1466405953	66.3587096721	7.8912	0.434	-12.217	10.1820	10.5118	9.7224	KELT-23A
KELT-2A	KELT-2A	3438059369839738624	1	F7V	6198.00	1.31	92.6640225727	30.9571333042	7.4309	16.740	-2.405	8.5839	8.8607	8.1781	KELT-2 A
KELT-7	KELT-7	181908842994567936	0	F2	6498.31	1.54	78.2955912090	33.3179532364	7.2879	10.622	-49.779	8.4517	8.6884	8.1127
KELT-8	KELT-8	4534144923690481408	0	F8	5438.45	0.81	283.3054489024	24.1272482510	5.0327	-14.583	-31.197	10.6699	11.0495	10.1559
Kepler-10	Kepler-10	2132155017099178624	3	G4	5546.82	0.91	285.6792979641	50.2414842236	5.3618	-18.394	41.448	10.9191	11.2713	10.4273
Kepler-1019	Kepler-1019	2107596978215473024	3	K8V	4397.50	0.70	283.7175908668	47.2043817737	5.1209	3.827	-18.368	13.5934	14.3121	12.7855
Kepler-102	Kepler-102	2119583201145735808	0	K3V	4772.32	0.80	281.4824730952	47.2078263332	9.2478	-41.143	-43.142	11.4784	12.0381	10.7987
Kepler-1049	Kepler-1049	2131059628640021120	0	M1V	4123.40	0.51	287.3469566760	47.7729078075	6.1437	28.176	-5.034	14.1559	15.0726	13.2180
Kepler-1053	Kepler-1053	2052973309272223232	0	K	4307.00	0.74	291.4186349484	39.1273664471	6.5880	-0.958	-7.369	13.2088	13.9446	12.3844
Kepler-125	Kepler-125	2086439488284337536	0	M1V	4060.79	0.55	298.2581101054	47.6050030509	5.4249	0.659	10.610	14.7675	15.7564	13.7894
Kepler-1308	Kepler-1308	2100018422524180864	0	M2V	3543.82	0.35	285.9287514346	38.5207097322	8.8439	-24.591	-57.653	14.4744	15.7363	13.3651
Kepler-1313	Kepler-1313	2125713940547834496	0	G5	5179.00	0.92	292.3885820263	42.2332766916	5.7106	1.894	3.884	11.7892	12.2212	11.2177
Kepler-1314	Kepler-1314	2079920724360946560	0	K		0.60	294.2373598511	45.1968273791	7.0429	-87.097	-108.808	17.1206	17.5922	15.6337
Kepler-1319	Kepler-1319	2129942765344872320	1	M2V	3976.12	0.56	290.9564462889	49.3667933387	9.5943	53.216	124.199	14.2218	15.4420	13.1062	Kepler-1319 A
Kepler-1446	Kepler-1446	2127777307254217472	3	K	4784.30	0.81	289.4240356862	46.7260822894	6.5469	12.322	-19.440	12.4086	13.0030	11.6986
Kepler-1582	Kepler-1582	2101449265111030912	0	M4V	3654.97	0.28	289.3765441300	41.1580845027	12.6475	-20.804	-119.916	16.4142	18.2039	15.1287
Kepler-1646	Kepler-1646	2102601381497162240	0	M	3718.60	0.24	287.5264859243	42.9129355509	7.8088	14.536	10.299	15.6554	17.0642	14.4861
Kepler-1649	Kepler-1649	2125699062780742016	0	M	3785.66	0.20	292.5029676117	41.8299932680	10.8187	-135.842	-99.232	16.2681	17.8678	15.0481
Kepler-1650	Kepler-1650	2078524482038704000	0	M3V	3310.25	0.33	297.7292295650	42.8666919187	7.4120	-1.683	-51.262	15.7393	17.1057	14.5816
Kepler-1651	Kepler-1651	2131725447350716032	1	M2V	4098.61	0.52	283.6282602289	48.3908081179	15.0296	-10.822	-48.674	13.0716	14.1763	12.0357	Kepler-1651 A
Kepler-1656	Kepler-1656	2103392720630278656	0	G	5601.00	1.03	284.4722473289	39.9118889677	5.3511	10.865	17.520	11.0622	11.4247	10.5640
Kepler-186	Kepler-186	2079000330051813504	3	M1V	4086.00	0.54	298.6527359701	43.9549884182	5.6020	2.099	-4.361	14.5994	15.5356	13.6491
Kepler-205	Kepler-205	2104076204545773440	3	M1V	4403.45	0.67	285.2866911758	41.8609356750	6.2320	-72.614	-51.604	13.4947	14.2494	12.6569
Kepler-21	Kepler-21	2099606483621385216	1	F6IV	6110.03	1.41	287.3619673169	38.7141383805	9.1859	27.951	28.585	8.1283	8.4100	7.7209	Kepler-21 A
Kepler-22	Kepler-22	2127941757262806656	0	G5	5522.50	0.97	289.2172050875	47.8841427461	5.1088	-39.717	-66.687	11.6444	12.0079	11.1382
Kepler-220	Kepler-220	2129084935820532608	0	K3V	4936.25	0.70	291.5060431643	46.8956261532	5.8154	-25.708	-33.961	12.8566	13.4763	12.1254
Kepler-249	Kepler-249	2078807228323035008	3	M2V	3580.50	0.51	296.9853001634	43.6586042687	5.2235	33.524	17.518	15.2305	16.3520	14.1808
Kepler-367	Kepler-367	2087250476887856256	0	K3V	4813.99	0.75	297.2925580147	49.9817498955	5.2896	16.799	24.215	12.8482	13.4371	12.1445
Kepler-37	Kepler-37	2106674071344722688	0	G	5402.25	0.87	284.0592502884	44.5183733309	15.6155	-60.520	48.694	9.5499	9.9499	9.0160
Kepler-378	Kepler-378	2080095512350543744	0	K	4791.66	0.96	294.9489696751	46.4388672654	6.5460	56.656	50.217	12.4551	13.0566	11.7401
Kepler-398	Kepler-398	2053457644144430848	0	K	4556.00	0.70	291.4688523845	40.3437001371	5.6095	30.664	-32.105	13.2351	13.9061	12.4610
Kepler-408	Kepler-408	2131593785132997632	0	F8V	6097.00	1.08	284.7862157903	48.4232622462	11.2346	4.585	9.362	8.6992	8.9920	8.2867
Kepler-409	Kepler-409	2128215909315876352	0	K0V	5327.00	0.92	293.6792057996	46.8527337355	14.6396	4.666	-6.007	9.3911	9.8077	8.8493
Kepler-410 A	Kepler-410 A	2106904148451706752	1	F6IV	6374.67	1.21	283.1510448223	45.1400838307	6.7495	61.515	61.846	9.3748	9.6276	8.9769
Kepler-411	Kepler-411	2132768952604988672	1	K3V	4832.69	0.87	287.6057027053	49.5233936898	6.4783	13.516	32.603	12.2327	12.7941	11.5534
Kepler-42	Kepler-42	2126556132093765888	0	M4V	4021.22	0.13	292.2195999720	44.6173667409	24.9340	93.126	-417.420	14.9931	16.4535	13.8112
Kepler-438	Kepler-438	2104675781979819776	3	M1V	3675.00	0.54	281.6457236472	41.9510686210	5.1035	-16.762	-4.921	14.4852	15.4859	13.4585
Kepler-444	Kepler-444	2101486923385239808	1	K0V	5134.00	0.76	289.7528322669	41.6318840256	27.4137	94.682	-632.202	8.6432	9.0883	8.0582	Kepler-444 A
Kepler-445	Kepler-445	2085482775729637376	3	M4V	3482.11	0.18	298.7363394839	46.4991236088	7.8335	41.516	132.173	16.7157	18.5167	15.4327
Kepler-446	Kepler-446	2106929849536047744	0	M4V	3483.76	0.22	282.2501047277	44.9210019756	10.3516	-12.466	-24.011	16.3101	17.7261	15.1397
Kepler-504	Kepler-504	2107186134525176960	1	M2V	3812.83	0.33	284.9219607763	45.9723265172	10.0652	19.183	-11.704	14.4582	15.6155	13.3930	Kepler-504 A
Kepler-538	Kepler-538	2087171453788422528	1	G5V	5399.33	0.89	297.4865502587	49.6233975206	6.3833	-49.314	-8.048	11.1647	11.5496	10.6458
Kepler-560	Kepler-560	2082162147537254400	1	M3V	3910.88	0.34	300.2066440610	45.0182402483	9.1197	84.785	18.964	14.7511	15.9412	13.6734
Kepler-568	Kepler-568	2086543048537237760	0	M1V	3773.44	0.55	298.1061314796	48.4016447763	7.6255	57.949	106.670	14.2513	15.3684	13.2038
Kepler-617	Kepler-617	2107607354856794880	0	M1V	3683.00	0.51	283.7407246749	47.5161237485	5.7399	-0.004	-37.659	14.8277	15.8974	13.8011
Kepler-63	Kepler-63	2132628489996257920	0	G5	5450.40	0.98	289.2262875846	49.5482813801	5.1250	14.336	23.364	11.5352	11.9237	11.0088
Kepler-68	Kepler-68	2129550445852902656	1	G2	5840.00	1.08	291.0323102112	49.0402129271	6.9076	-7.334	-10.430	9.9335	10.2723	9.4639
Kepler-732	Kepler-732	2107406178588473728	0	M2V	3949.86	0.49	283.7317274329	45.9585288221	5.6912	-41.141	-52.646	15.0519	16.1942	13.9995
Kepler-93	Kepler-93	2052747119115620352	3	G5	5631.83	0.91	291.4181274523	38.6723124235	10.3974	-28.726	-5.588	9.8625	10.2311	9.3637
Kepler-94	Kepler-94	2119602202081351168	0	M0V	4534.49	0.81	281.1947315774	47.4972606004	5.1821	-5.584	25.253	12.8567	13.4842	12.1245
Kepler-96	Kepler-96	2073731161099713408	3	G2V	5651.50	1.00	297.0698263417	40.5252038781	8.1091	32.834	13.652	10.2971	10.6561	9.8058
Kepler-974	Kepler-974	2103377980301947264	3	M1V	3712.08	0.52	285.0131082060	40.2209547102	7.4166	0.691	41.187	14.4126	15.5603	13.3520
Kepler-994	Kepler-994	2127904992341848960	0	M0V	3924.50	0.56	289.0720752029	47.4069179704	5.2858	-17.959	-31.732	14.4652	15.3829	13.4982
Kepler-78	Kepler-78	2078373642776670080	1	K2	5024.09	0.83	293.7419542572	44.4482521135	8.0113	38.060	-16.111	11.5287	12.0236	10.9053	KIC 8435766
KOI-314	KOI-314	2102053446751282944	0	M1V	4127.09	0.52	290.3814121606	43.2930644982	14.9272	-20.599	22.698	12.4715	13.4098	11.5274	Kepler-138
L 168-9	L 168-9	6491962296196145664	0	M2V	3661.79	0.62	350.0285917454	-60.0657292357	39.7331	-319.961	-127.781	10.2316	11.2811	9.2523
L 98-59	L 98-59	5271055243163629056	0	M2	3786.00	0.31	124.5328604499	-68.3144657887	94.1385	94.767	-340.470	10.5976	11.9775	9.4720
L2 Pup	* L02 Pup		1	M5IIIe		0.66	108.3846587610	-44.6397397400	15.6100	106.310	324.990
Lalande 21185	HD 95735		0	M2V		0.46	165.8333333400	35.9700000220	392.6400	-580.270	-4765.850				GJ 411
LHS 1140	LHS 1140	2371032916186181760	0	M4.5	3837.45	0.15	11.2486320112	-15.2741085300	66.6996	317.585	-596.617	12.6706	14.4352	11.3989
LHS 1815	LHS 1815	5500061456275483776	0	M2.5V	3954.13	0.50	91.0899861036	-55.3115375939	33.4805	681.726	342.132	11.2362	12.4074	10.1802
LHS 3844	LHS 3844	6385548541499112448	0	M7	3756.29	0.15	340.4962037684	-69.1721081099	67.1548	334.357	-726.974	13.3925	15.4512	12.0517
LHS 6176 A	LHS 6176	3846639574348918528	0	M4	3923.93	0.25	147.7076433684	1.3022328019	50.8011	234.644	-360.553	12.6334	14.1762	11.4321
LP 261-75	LP 261-75	796443724462555904	0	M4.5Ve	3692.03	0.22	147.7685280940	35.9685562329	29.4464	-100.975	-171.822	13.8330	15.6355	12.5406
LP 791-18	LP 791-18	3562427951852172288	0	M6V	3515.96	0.14	165.6904843468	-16.4064444990	37.7177	-221.078	-58.999	15.0715	17.2383	13.6951
LSPM J2116+0234	LSPM J2116+0234	2692455319291894400	0	M3.0Ve	3673.64	0.43	319.1147513348	2.5807710658	56.6935	247.523	-39.677	10.8595	12.2244	9.7397
LTT 1445 A	LTT 1445 A	5153091836072107136	1	M3.0	3785.02	0.26	45.4624780557	-16.5944956147	145.5466	-369.196	-268.510	10.0469	11.5009	8.9095	LTT 1445A
MASCARA-1	MASCARA-1	1744911763437512064	0	A8	7845.75	1.72	317.5515263838	10.7388966940	5.4583	-5.719	5.379	8.2424	8.3669	8.0521
MASCARA-4	MASCARA-4	5245968236116294016	1	A3V	8004.25	1.75	147.5800667304	-66.1139253423	5.8297	6.051	-15.398	8.1740	8.2832	8.0285	HD 85628 A
mu Arae	mu Arae	5945941905576552064	0	G3IV-V	5804.50	1.08	266.0361584661	-51.8348750801	64.0817	-15.310	-190.919	4.9046	5.3127	4.4691	HD 160691, mu Ara
mu Leo	mu Leo	643819484616249984	0	K2III	4474.00	1.50	148.1898672919	26.0067142322	30.6493	-215.745	-54.843	3.4213	4.2218	2.8407
NGTS-11	UCAC2 26590993	2453680078509741056	0	K	4983.50	0.86	23.5214496554	-14.4191492796	5.2231	11.168	14.047	12.1895	12.6725	11.5707
NGTS-7A	NGTS-7A	6538398353024629888	1	M3	4070.14	0.48	352.5216665551	-38.9699206451	7.2497	-27.003	-16.225	14.9154	15.7357	13.4067
NLTT 41135	NLTT 41135	4426270875805011840	1	M5.1	4359.07	0.19	236.5186320063	4.6904654820	29.2662	162.509	-282.725	14.9364	16.8452	13.5770
NLTT 5306	NLTT 5306	2588874825669925504	0	DA	7800.50	0.44	23.8868110216	14.7648785315	12.8258	-131.560	-150.764	16.9219	17.0441	16.6379
nu Oph	nu Oph	4164319171169516160	0	G9IIIa	4988.50	3.04	269.7566013138	-9.7741341773	23.0524	-10.153	-119.322	2.9779	3.8027	2.5790
Omega Serpentis	Omega Serpentis	4423234230853333632	1	K0IV	4775.00	2.17	237.5732422256	2.1963039568	13.0020	30.598	-48.052	4.8828	5.4645	4.2773	ome Ser, omega Ser
omi CrB	omi CrB	1275235752223276288	0	K0III	4769.61	2.13	230.0350767656	29.6160222439	11.7660	-118.050	-42.807	5.1875	5.7559	4.5679	omicron CrB, omi CrB
omi UMa	omi UMa	1041808368494264576	1	G5III	4766.25	3.09	127.5649502801	60.7177048484	16.5293	-135.270	-107.746	3.0268	3.7724	2.6874	omicron UMa, omi UMa A
PDS 70	PDS 70	6110141563309613056	0	K7IVe	4225.67	0.76	212.0421402297	-41.3980405283	8.8159	-29.661	-23.823	11.5848	12.3867	10.7157
PHL 5038	PHL 5038	2677851743291189888	0	DA		0.70	335.1276961783	-0.6861458488	13.7108	-47.582	-171.006	17.3496	17.5000	17.0909
Proxima Centauri	Proxima Centauri	5853498713160606720	1	M5.5Ve	3295.50	0.12	217.3934657426	-62.6761821029	768.5003	-3781.305	769.765	8.9536	11.3829	7.5864
Psi-1 Draconis B	* psi01 Dra B	1651268763281885952	1	F8V	6213.33	1.19	265.4925753995	72.1557113548	43.9875	33.786	-275.856	5.6299	5.9341	5.2497
PZ Tel	PZ Tel	6655168686921108864	0	G9IV	5337.50	1.13	283.2745823348	-50.1808952270	21.2186	16.348	-85.254	8.0989	8.5181	7.5462
Qatar-1	Qatar 1	2244830490514284928	0	K3V	4742.02	0.85	303.3818696768	65.1623312629	5.3587	12.636	58.170	12.4764	13.0328	11.7914
Qatar-2	Qatar 2	3620030644476623616	0	K5V	4649.14	0.74	207.6554928024	-6.8040713551	5.4849	-88.184	-15.290	13.0276	13.6946	12.2608
Qatar-6	Qatar 6	1265513389372846848	1	K2V	4888.73	0.82	222.2100773327	22.1526136273	9.8873	-51.908	16.020	11.1249	11.6564	10.4938	Qatar-6 A
Rho Coronae Borealis	Rho Coronae Borealis	1323427759184545536	0	G0V	5852.50	0.89	240.2600639145	33.3001860639	57.2216	-198.536	-772.415	5.2094	5.5686	4.7755	rho CrB, HD 143761
Ross 128	Ross 128	3796072592206250624	0	M4V	3305.00	0.17	176.9376035942	0.7992898398	296.3073	607.678	-1223.323	9.5907	11.3880	8.3454
ROXs 12	ROXs 12	6048935358761628288	1	M0.0e	3424.33	0.65	246.6167992628	-25.4466949988	7.2894	-7.185	-24.851	13.2655	14.5998	12.1217
SDSS J1411+2009	SDSS J141126.20+200911.1	1246281350455075840	0	DA		0.53	212.8590480390	20.1531365249	5.6550	-45.676	15.951	17.9188	17.8825	17.8754
sig Per	sig Per	249147311931264384	0	K3III	4215.33	2.25	52.6437145204	47.9952979296	9.6940	2.724	18.847	3.8049	4.6313	3.0928
TAP 26	TAP 26	47316005432912256	0	K7e	4389.06	1.04	64.7154450171	17.3878826070	8.2084	3.087	-13.062	11.8101	12.4877	11.0270
tau Boo A	tau Boo A	1244571953471006720	1	F7IV-V	6420.00	1.39	206.8134593325	17.4571646992	63.8638	-467.909	64.695	4.2948	4.6266	3.9866	tau Boo
tau Ceti	tau Ceti	2452378776434276992	0	G8V	5375.00	0.78	26.0093028767	-15.9337986509	277.5162	-1729.726	855.493	3.1336	3.7571	2.7556	tau Cet
tau Gem	tau Gem	886479673643096448	1	K2III	4408.33	2.30	107.7847232226	30.2449545242	8.8779	-31.494	-48.280	3.9539	4.6950	3.3041
TOI-1130	TOI 1130	6715688452614516736	0	K7	4341.40	0.68	286.3760036736	-41.4376398836	17.1355	12.538	-27.180	10.9028	11.6530	10.0917
TOI-1235	TOI 1235	1070387905514406400	0	M0.5Ve	3996.22	0.64	152.2182548630	69.2766204033	25.2016	196.631	17.369	10.8492	11.7780	9.9274
TOI-125	TOI 125	4698692744355471616	0	K0V	5150.00	0.86	23.5934253330	-66.6763494605	8.9755	-119.800	-122.953	10.7180	11.1534	10.1500
TOI-1266	UCAC4 780-025091	1678074272650459008	0	M2	3923.09	0.44	197.9965832534	65.8336973106	27.7397	-150.652	-25.368	12.1222	13.2711	11.0747
TOI-132	TOI 132	6520880040423258240	1	G8V	5298.50	0.97	338.3996623091	-43.4368719694	6.0809	35.553	-53.055	11.3208	11.7575	10.7641
TOI-216	TOI 216	4664811297844004352	0	K1	4961.31	0.87	73.9800129276	-63.2603300892	5.5909	-22.699	-56.352	12.1631	12.6767	11.5256
TOI-257	HD 19916	4747624104168195072	0	F8	6050.00	1.39	47.5172607692	-50.8322632045	12.9746	97.912	27.911	7.4165	7.7296	6.9935
TOI-270	TOI 270	4781196115469953024	0	M3V	3886.16	0.40	68.4160804338	-51.9573937399	44.4565	82.944	-269.755	11.6306	12.8702	10.5431
TOI-421	BD-14 1137	2984582227215748864	1	G9V	5272.27	0.92	81.8532823600	-14.2767403776	13.3407	-35.687	50.450	9.7778	10.2034	9.2265
TOI-677	2MASS J09362869-5027478	5313031504751276032	0	F8	5894.67	1.18	144.1193593581	-50.4630933379	7.0228	-24.817	42.417	9.6608	9.9684	9.2289
TOI-700	TOI 700	5284517766615492736	0	M2V	3998.78	0.42	97.0957165364	-65.5786148915	32.0980	-102.750	161.805	12.0665	13.3503	10.9599
TOI-905	TYC 9266-362-1	5795534040654879744	0	K0	5408.00	0.85	227.6586753780	-71.3616316283	6.2745	-25.839	-41.150	11.0813	11.5089	10.5280
TrES-1	V* V672 Lyr	2098964849867337856	1	K0V	5295.24	0.88	286.0408755433	36.6325360268	6.2346	-32.207	-20.401	11.5565	12.0029	10.9745
TYC 123-549-1	TYC 123-549-1	3320730831934047104	0	G7	5425.33	1.02	85.8280481692	5.2205104363	8.9693	-10.397	-38.864	10.1870	10.5787	9.6474
TYC 3130-160-1	TYC 3130-160-1	2116903725669781760	0	K0	5201.30	1.06	280.7836423767	43.1280383984	8.6457	107.131	98.018	10.6596	11.1194	10.0737
TYC 3547-1007-1	TYC 3547-1007-1	2129260106062213504	0	G1V	6119.00	1.12	292.1925828210	48.0421544387	5.3647	14.528	7.868	10.5184	10.8142	10.0940
TYC 8998-760-1	TYC 8998-760-1	5864061893213196032	0	K3IV	4783.29	1.00	201.3001095798	-64.9391566415	10.5400	-40.898	-17.788	10.6505	11.2312	9.9574
TYC 9486-927-1	TYC 9486-927-1	6348514275456913792	0	M1Ve	3829.88	0.40	321.3662988696	-81.6414893979	29.2836	59.843	-107.723	10.8133	11.9900	9.7559
Upsilon Andromedae A	ups And	348020448377061376	1	F9V	6105.00	1.27	24.1983533668	41.4038147242	74.5711	-172.248	-382.898	3.8985	4.2538	3.5482	ups And, upsilon And
USco 1556 A	2MASS J15562491-2541202	6235663460003427200	0	M3.0e	3828.27	0.33	239.1037198218	-25.6890476339	7.0835	-18.446	-22.386	14.3099	15.7851	13.1249	USco1556 A
USco 1621 A	2MASS J16212953-2529431	6048608906890968960	0	M2.5e	3529.61	0.36	245.3730854723	-25.4954264950	7.2232	-6.138	-25.617	14.1769	15.6385	12.9776	USco1621 A
USco1602-2401	2MASS J16025116-2401502	6236273895118889472	0	K4	4326.00	0.80	240.7133886022	-24.0327325349	6.9484	-11.850	-24.031	11.8656	12.6454	11.0128
USco1612-1800	2MASS J16124893-1800525	6249313690700531328	0	M3e	3740.81	0.36	243.2038564169	-18.0146731495	6.3160	-7.418	-21.148	14.5531	16.2428	13.2921
V 1298 Tau	V 1298 Tau	51886335968692480	1	K1	4962.28	1.10	61.3316540350	20.1570317620	9.2139	5.228	-16.077	10.0702	10.5710	9.4440	V1298 Tau
V396 Hya	V396 Hya	3503987633230546688	0	DD		0.32	198.1921584953	-23.3593109208	10.6936	-286.331	-59.209	17.6579	17.7026	17.4474
V830 Tau	V830 Tau	147831571737487488	0	M0-1	4020.37	1.00	68.2918258618	24.5619241094	7.6571	7.247	-21.230	11.6928	12.5946	10.7562
WASP-10	WASP-10	1909762228985058944	0	K5V	4877.88	0.71	348.9930457052	31.4627508480	7.0636	25.110	-25.269	12.1739	12.7649	11.4636
WASP-104	WASP-104	3868603216762016256	1	G8	5123.50	1.08	160.6023688919	7.4350768201	5.3498	-32.170	-1.165	11.5931	12.0359	11.0178
WASP-107	WASP-107	3578638842054261248	0	K6	4233.19	0.69	188.3864276706	-10.1462141300	15.4175	-96.646	-9.482	11.1740	11.9253	10.3740
WASP-11	WASP-11	123376685084303360	1	K3V	4833.55	0.82	47.3689472330	30.6733816624	7.9921	3.856	-44.826	11.5535	12.1013	10.8850	HAT-P-10 A
WASP-117	WASP-117	4746157737910069888	0	F9	5990.10	1.13	36.7758112050	-50.2844246579	6.3018	59.958	24.743	10.0269	10.3292	9.5968
WASP-123	WASP-123	6756148659453907200	1	G5	5522.00	1.21	289.4792124435	-32.8601244250	5.0238	-16.778	-31.803	10.8999	11.2855	10.3853
WASP-127	WASP-127	3778075717162985600	1	G5	5858.05	1.08	160.5587645795	-3.8349988681	6.2409	19.224	17.026	10.0540	10.3923	9.5842
WASP-130	WASP-130	6112606840179716096	3	G6	5537.67	1.04	203.1060194211	-42.4752732950	5.7770	6.111	-1.238	10.9717	11.3670	10.4458
WASP-132	WASP-132	6099012478412247296	0	K4	4812.34	0.80	217.6091997680	-46.1595159828	8.1073	12.561	-73.208	11.7537	12.3302	11.0600
WASP-134	WASP-134	2696613294311603584	0	G4	5419.75	1.13	327.5700112862	4.1945734438	5.1174	26.430	2.870	10.8840	11.2705	10.3644
WASP-14	WASP-14	1242084170974175232	1	F5V	6521.75	1.21	218.2766247227	21.8946875107	6.1442	29.242	-6.951	9.6465	9.8925	9.2814
WASP-140	WASP-140	5094154336330994688	1	K0	5333.83	0.90	60.3855387033	-20.4509990617	8.4749	-18.665	20.276	10.8202	11.2514	10.2629
WASP-145 A	WASP-145 A	6458529931463278848	1	K2V	4798.26	0.76	322.2537644388	-58.8361465575	10.9242	107.107	11.185	11.3583	11.9342	10.6713
WASP-156	WASP-156	2514360548993901312	0	K3	4970.21	0.84	32.7820850057	2.4181937296	8.1637	74.190	40.056	11.3227	11.8460	10.6866
WASP-16	WASP-16	6283723285046532864	0	G3V	5561.00	1.02	214.6830108645	-20.2754374292	5.1230	-0.040	17.257	11.1247	11.5094	10.5968
WASP-166	WASP-166	5664957444179338240	0	F9	5981.00	1.19	144.8751046976	-20.9824190535	8.7301	-55.082	10.927	9.2570	9.5645	8.8272
WASP-177	WASP-177	2677447294810845824	0	K2	4970.95	0.88	334.7969885294	-1.8344300850	5.6283	-57.586	-56.075	12.0715	12.5840	11.4369
WASP-18	WASP-18	4955371367334610048	1	F6IV/V	6462.01	1.24	24.3544618446	-45.6777936827	8.0694	25.243	20.597	9.1662	9.4274	8.7881
WASP-189	WASP-189	6339097679918871168	1	A4/5IV/V	7850.11	1.89	225.6867319526	-3.0314874202	9.9990	-50.564	-23.788	6.5537	6.6756	6.3959
WASP-2 A	WASP-2	1748596020745038208	1	K1V	4994.20	0.89	307.7255587272	6.4293305365	6.4980	5.936	-48.279	11.5638	12.0466	10.9455	WASP-2
WASP-29	WASP-29	6534414719318224512	1	K4V	4731.57	0.82	357.8791976272	-39.9071214927	11.3874	-56.853	-88.865	10.8932	11.4815	10.2028
WASP-33	WASP-33	328636019723252096	1	A5	7398.50	1.50	36.7127375104	37.5504440563	8.1724	-0.976	-8.977	8.0700	8.2213	7.8438
WASP-34	WASP-34	3537110833333561728	0	G5	5638.61	1.01	165.3993678651	-23.8609456927	7.5418	-43.900	-65.794	10.2046	10.5652	9.7101
WASP-38	WASP-38	4453211899986180352	0	F8	6170.00	1.23	243.9597194028	10.0324103494	7.3115	-31.073	-39.171	9.2097	9.5015	8.7926
WASP-41	WASP-41	6160877943251930368	0	G8V	5380.00	0.93	190.6188034485	-30.6398175948	6.0925	14.900	11.888	11.2823	11.6951	10.7445
WASP-42	WASP-42	6139698733664726784	0	K1	4901.75	0.88	192.9812029708	-42.0736165263	5.6120	-49.781	4.865	11.9686	12.4834	11.3195
WASP-43	WASP-43	3767805209112436736	0	K7V	4305.75	0.72	154.9081868970	-9.8064430799	11.4991	-42.044	-38.192	11.9070	12.6938	11.0587
WASP-49	WASP-49	2991284369063612928	1	G6V	5537.00	0.94	91.0897192973	-16.9653900774	5.1113	54.769	-19.061	11.2907	11.6758	10.7674	WASP-49 A
WASP-50	WASP-50	5160557726183065984	0	G9V	5434.00	0.89	43.6880738446	-10.8980241960	5.3816	3.281	8.963	11.5518	11.9651	11.0051
WASP-52	WASP-52	2666015878575546496	0	K2V	5008.37	0.87	348.4947931371	8.7610792955	5.6918	-6.914	-44.248	11.9537	12.4440	11.3312
WASP-59	WASP-59	2841043011433969152	1	K5V	4391.95	0.72	349.6229546614	24.8892770340	8.5968	-33.729	-2.522	12.3142	13.0474	11.4968
WASP-6	WASP-6	2385171398768647552	0	G8V	5372.00	0.55	348.1571281961	-22.6741248217	5.0446	-23.305	-36.895	11.9761	12.3853	11.4272
WASP-62	WASP-62	4756649415309914240	0	F7	6125.95	1.25	87.1398205343	-63.9883286434	5.6649	-15.641	26.046	10.0721	10.3550	9.6701
WASP-67	WASP-67	6868476691490044672	0	K0V	5037.54	0.91	295.7438485112	-19.9497313850	5.2496	1.759	-32.902	11.9141	12.3875	11.3037
WASP-69	WASP-69	6910753016653587840	0	K5	4875.20	0.83	315.0259660882	-5.0948570201	19.9871	33.676	-93.436	9.4847	10.0477	8.8183
WASP-7	WASP-7	6681720724498802176	0	F5V	6520.83	1.28	311.0427557975	-39.2254856416	6.1330	30.468	-57.355	9.3767	9.6241	9.0102
WASP-74	WASP-74	4224062406762625152	0	F9	5604.00	1.48	304.5388430197	-1.0760032641	6.6734	1.350	-64.604	9.5723	9.9281	9.0855
WASP-76	WASP-76	2512326349403275520	1	F7	6114.67	1.46	26.6329359775	2.7003890227	5.1204	45.398	-40.819	9.3951	9.6873	8.9895
WASP-77 A	WASP-77 A	5178405479960844160	1	G8	5556.00	1.00	37.1555222603	-7.0606674932	9.4818	93.889	-1.567	10.0966	10.4849	9.5856	WASP-77A
WASP-8	WASP-8	2312679845530628096	1	G6	5610.00	1.04	359.9008736696	-35.0313348523	11.0873	109.747	7.614	9.6125	9.9968	9.1051
WASP-80	WASP-80	4223507222112425344	3	K7V	4076.05	0.57	303.1667995596	-2.1444368916	20.0565	-132.759	-50.429	11.2730	12.1676	10.3662
WASP-84	WASP-84	3078836109158636928	0	K0	5219.10	0.85	131.1069958920	1.8598933136	9.9130	-23.480	-31.653	10.5745	11.0193	9.9990
WASP-85 A	WASP-85 A	3909745223886018432	1	G8	5817.33	1.09	175.9080327575	6.5637841521	7.0197	-77.240	11.016	10.6241	10.9016	9.9935	WASP-85
WASP-91	WASP-91	6386751579018596864	0	K3	5041.40	0.84	357.8464339999	-70.1528620717	6.6403	96.184	-1.746	11.6236	12.1275	10.9962
WASP-95	WASP-95	6518399301667782016	0	G2	5761.00	1.11	337.4578242610	-48.0030987783	7.2418	91.976	-6.861	9.9370	10.2911	9.4568
WASP-97	WASP-97	4911563216311083392	0	G5	5563.70	1.12	24.6051389159	-55.7720005742	6.5906	96.163	20.946	10.4238	10.7912	9.9235
WASP-99	WASP-99	4745660479479743488	0	F8	5926.33	1.48	39.8976688895	-50.0081933715	6.2740	-1.868	-39.856	9.3251	9.6398	8.8895
WD 0137-349	WD 0137-349	5012047927570807552	0	DA	8868.67	0.39	24.9283346716	-34.7112043701	9.7786	-42.022	-48.996	15.3684	15.2599	15.4855
WD 0806-661	WD 0806-661	5274517467840296832	0	DQ	9552.00	0.62	121.7275682616	-66.3058835421	51.9342	335.547	-288.888	13.6826	13.6575	13.6171	WD 0806-661B
WD 1145+017	WD 1145+017	3796414192429498880	0	DB		0.60	177.1399357583	1.4831550268	7.0585	-43.710	-4.102	17.1671	17.0393	17.2342
Wolf 1061	Wolf 1061	4330690742322011520	0	M3V	3727.36	0.25	247.5748275727	-12.6676866377	232.2095	-94.027	-1183.784	8.7944	10.3432	7.6042	GJ 628
Wolf 359	Wolf 359		0	M6Ve		0.10	164.1208333430	7.0144444560	413.1300	-3808.090	-2692.610
Wolf 503	Wolf 503	3620325206217720320	0	K3.5V	4855.15	0.69	206.8461978859	-6.1393368567	22.4300	-342.833	-573.134	9.8982	10.4867	9.1952
Wolf 940	Wolf 940	2681122098893985408	0	M4	3615.80	0.27	326.6717412191	-0.1754470519	80.7724	769.495	-505.666	11.3142	12.9284	10.0952
xi Aql	xi Aql	4298361114750843904	0	G9.5IIIb	4707.00	2.20	298.5624491204	8.4611050744	17.7725	101.177	-80.576	4.3563	4.9598	3.7560	ksi Aql
XO-1	XO-1	1316708918505350528	0	G1V	5517.67	0.88	240.5492745369	28.1696248210	6.0854	-17.422	14.820	11.0040	11.3694	10.4988
XO-2N	XO-2N	934346809278715776	1	G9V	5167.90	0.97	117.0267690802	50.2251471948	6.4539	-29.731	-154.272	10.9718	11.4165	10.4030	XO-2 N
XO-2S	XO-2S	934346740559239296	1	G9V	5444.18	0.98	117.0309753275	50.2169068472	6.5765	-29.317	-154.398	10.9278	11.3562	10.3712	XO-2 S
YZ Cet	YZ Cet	2358524597030794112	0	M4.0Ve	3296.50	0.13	18.1330792412	-16.9962434218	269.3628	1205.176	637.758	10.4294	12.3561	9.1500
zet Del A	zet Del	1804510069668710400	0	A3Va	8339.33	2.50	308.8274368255	14.6742644930	14.9535	46.110	12.560	4.5773	4.6911	4.5274
